# Supplementary material for: Ahmpatinin iBu, a new HIV-1 protease inhibitor, from Streptomyces sp. CPCC 202950
Source: Royal Society of Chemistry journal article supplement (doi:10.1039/c7ra13241g), 2018-01-01
Supplement: c7ra13241g1.pdf [file c7ra13241g1.pdf]

# Ahmpatinin <sup>i</sup>Bu, a new HIV-1 protease inhibitor, from a *Streptomyces* sp. CPCC 202950

Ming-Hua Chen,<sup>†ac</sup> Shan-Shan Chang,<sup>†ab</sup> Biao Dong,<sup>a</sup> Li-Yan Yu,<sup>a</sup> Ye-Xiang Wu,<sup>a</sup>  
Ren-Zhong Wang,<sup>a</sup> Wei Jiang,<sup>a</sup> Zeng-Ping Gao,<sup>\*b</sup> Shu-Yi Si<sup>\*a</sup>

---

<sup>a.</sup> *Institute of Medicinal Biotechnology, Chinese Academy of Medical Sciences & Peking Union Medical College, Beijing 100050, China. E-mail: sisymb@hotmail.com (S. Si)*

<sup>b.</sup> *School of Chinese Materia Medica, Beijing University of Chinese Medicine, Beijing 100102, China. E-mail: gaozp@bucm.edu.cn (Z. Gao)*

<sup>c.</sup> *Key Laboratory for Uighur Medicine, Institute of Materia Medica of Xinjiang, Urumqi 830004, China.*

## Supporting Information

## List of Content

| No. | Content                                                                                                    | Page |
|-----|------------------------------------------------------------------------------------------------------------|------|
| 1   | <b>Figure S1.</b> The IR Spectrum of Compound <b>1</b>                                                     | S3   |
| 2   | <b>Figure S2.</b> The (+)-HRESIMS Spectroscopic Data of Compound <b>1</b>                                  | S4   |
| 3   | <b>Figure S3.</b> The $^1\text{H}$ NMR Spectrum of Compound <b>1</b> in $\text{DMSO}-d_6$                  | S5   |
| 4   | <b>Figure S4.</b> The $^{13}\text{C}$ NMR Spectrum of Compound <b>1</b> in $\text{DMSO}-d_6$               | S6   |
| 5   | <b>Figure S5.</b> The DEPT Spectrum of Compound <b>1</b> in $\text{DMSO}-d_6$                              | S7   |
| 6   | <b>Figure S6.</b> The $^1\text{H}$ - $^1\text{H}$ COSY Spectrum of Compound <b>1</b> in $\text{DMSO}-d_6$  | S8   |
| 7   | <b>Figure S7.</b> The HSQC Spectrum of Compound <b>1</b> in $\text{DMSO}-d_6$                              | S9   |
| 8   | <b>Figure S8.</b> The HMBC Spectrum of Compound <b>1</b> in $\text{DMSO}-d_6$                              | S10  |
| 9   | <b>Figure S9.</b> The NOESY Spectrum of Compound <b>1</b> in $\text{DMSO}-d_6$                             | S11  |
| 10  | <b>Figure S10.</b> The IR Spectrum of Compound <b>2</b>                                                    | S12  |
| 11  | <b>Figure S11.</b> The (-)-HRESIMS Spectroscopic Data of Compound <b>2</b>                                 | S13  |
| 12  | <b>Figure S12.</b> The $^1\text{H}$ NMR Spectrum of Compound <b>2</b> in $\text{DMSO}-d_6$                 | S14  |
| 13  | <b>Figure S13.</b> The $^{13}\text{C}$ NMR Spectrum of Compound <b>2</b> in $\text{DMSO}-d_6$              | S15  |
| 14  | <b>Figure S14.</b> The DEPT Spectrum of Compound <b>2</b> in $\text{DMSO}-d_6$                             | S16  |
| 15  | <b>Figure S15.</b> The $^1\text{H}$ - $^1\text{H}$ COSY Spectrum of Compound <b>2</b> in $\text{DMSO}-d_6$ | S17  |
| 16  | <b>Figure S16.</b> The HSQC Spectrum of Compound <b>2</b> in $\text{DMSO}-d_6$                             | S18  |
| 17  | <b>Figure S17.</b> The HMBC Spectrum of Compound <b>2</b> in $\text{DMSO}-d_6$                             | S19  |
| 18  | <b>Figure S18.</b> The NOESY Spectrum of Compound <b>2</b> in $\text{DMSO}-d_6$                            | S20  |
| 19  | <b>Figure S19.</b> The IR Spectrum of Compound <b>3</b>                                                    | S21  |
| 20  | <b>Figure S20.</b> The (+)-HRESIMS Spectroscopic Data of Compound <b>3</b>                                 | S22  |
| 21  | <b>Figure S21.</b> The $^1\text{H}$ NMR Spectrum of Compound <b>3</b> in $\text{DMSO}-d_6$                 | S23  |
| 22  | <b>Figure S22.</b> The $^{13}\text{C}$ NMR Spectrum of Compound <b>3</b> in $\text{DMSO}-d_6$              | S24  |
| 23  | <b>Figure S23.</b> The DEPT Spectrum of Compound <b>3</b> in $\text{DMSO}-d_6$                             | S25  |
| 24  | <b>Figure S24.</b> The $^1\text{H}$ - $^1\text{H}$ COSY Spectrum of Compound <b>3</b> in $\text{DMSO}-d_6$ | S26  |
| 25  | <b>Figure S25.</b> The HSQC Spectrum of Compound <b>3</b> in $\text{DMSO}-d_6$                             | S27  |
| 26  | <b>Figure S26.</b> The HMBC Spectrum of Compound <b>3</b> in $\text{DMSO}-d_6$                             | S28  |
| 27  | <b>Figure S27.</b> Marfey's Analysis of Acid Hydrolysate of Compound <b>1</b>                              | S29  |
| 28  | <b>Figure S28.</b> Chiral-phase HPLC Analysis of Acid Hydrolysate of Compound <b>1</b>                     | S30  |

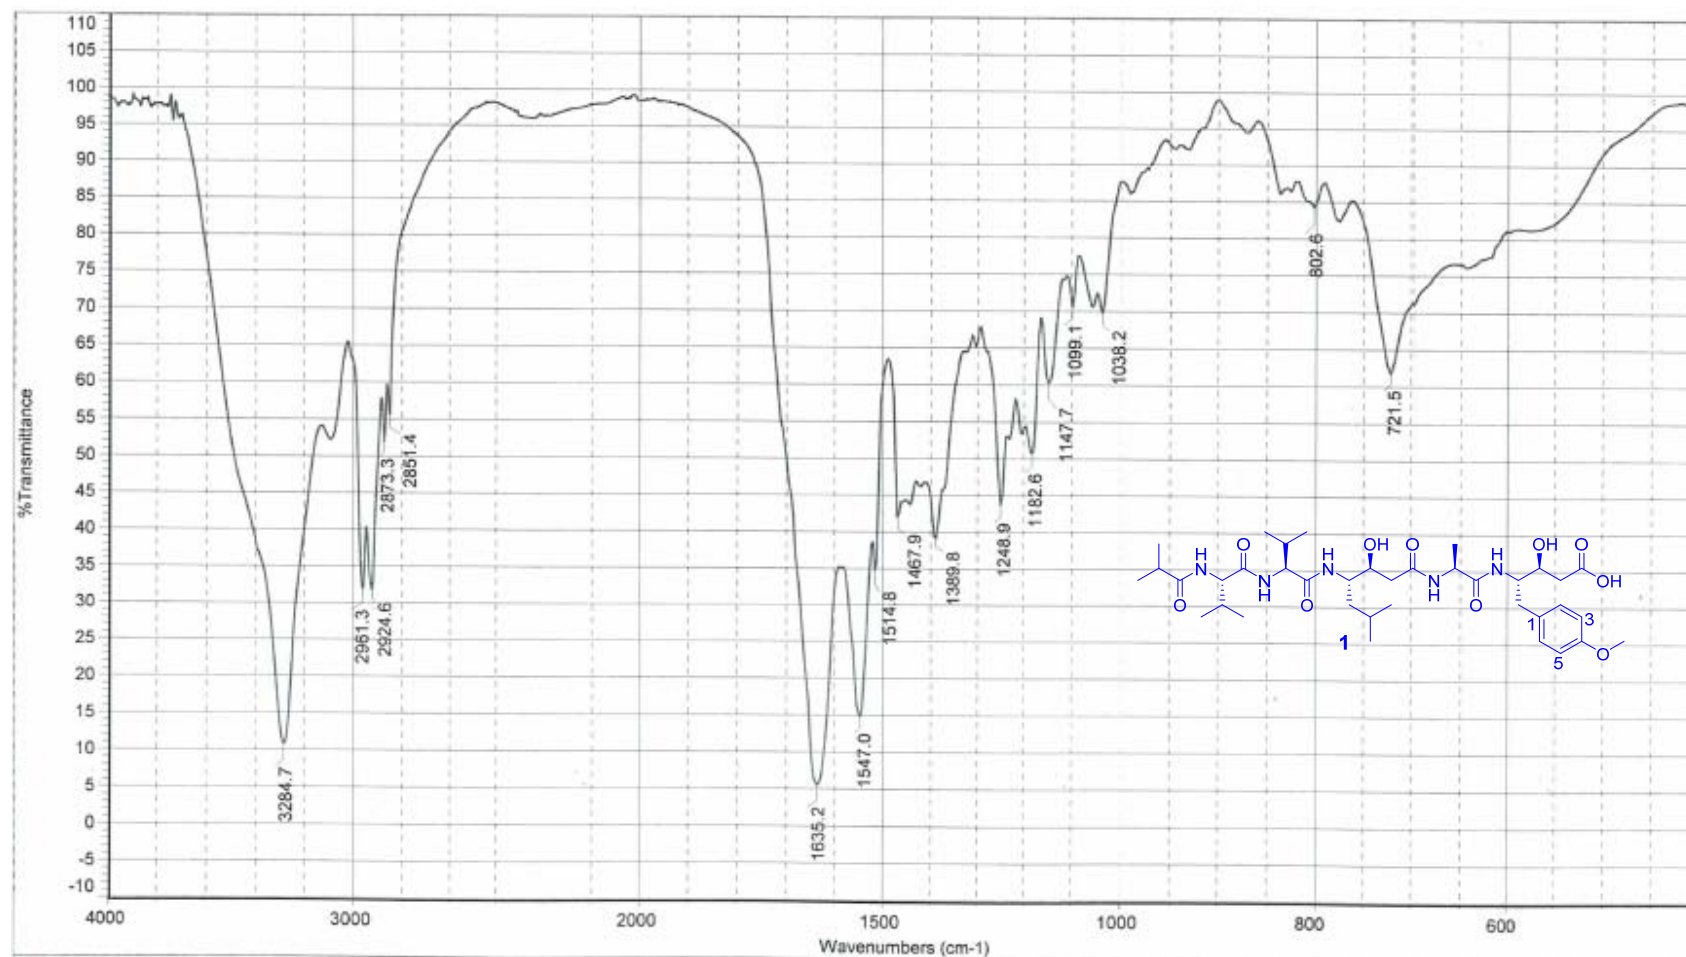

日期: 星期一 7月 11 15:16:47 2016 (GMT+08:00) Sample Name: CSS - 26

(显微镜透射法FT- IR Microscope Transmission)

扫描次数: 100

傅里叶变换显微镜红外(FT-IR Microscope): Centaurus

分辨率: 8.000

美国热电公司(Thermo)傅里叶变换红外光谱仪:Nicolet 5700

**Figure S1.** The IR Spectrum of Compound 1



20160407 CSS-26  
 Bruker AVIIIHD 600 20160407  
 PROTON DMSO D:\ DATA2016 3

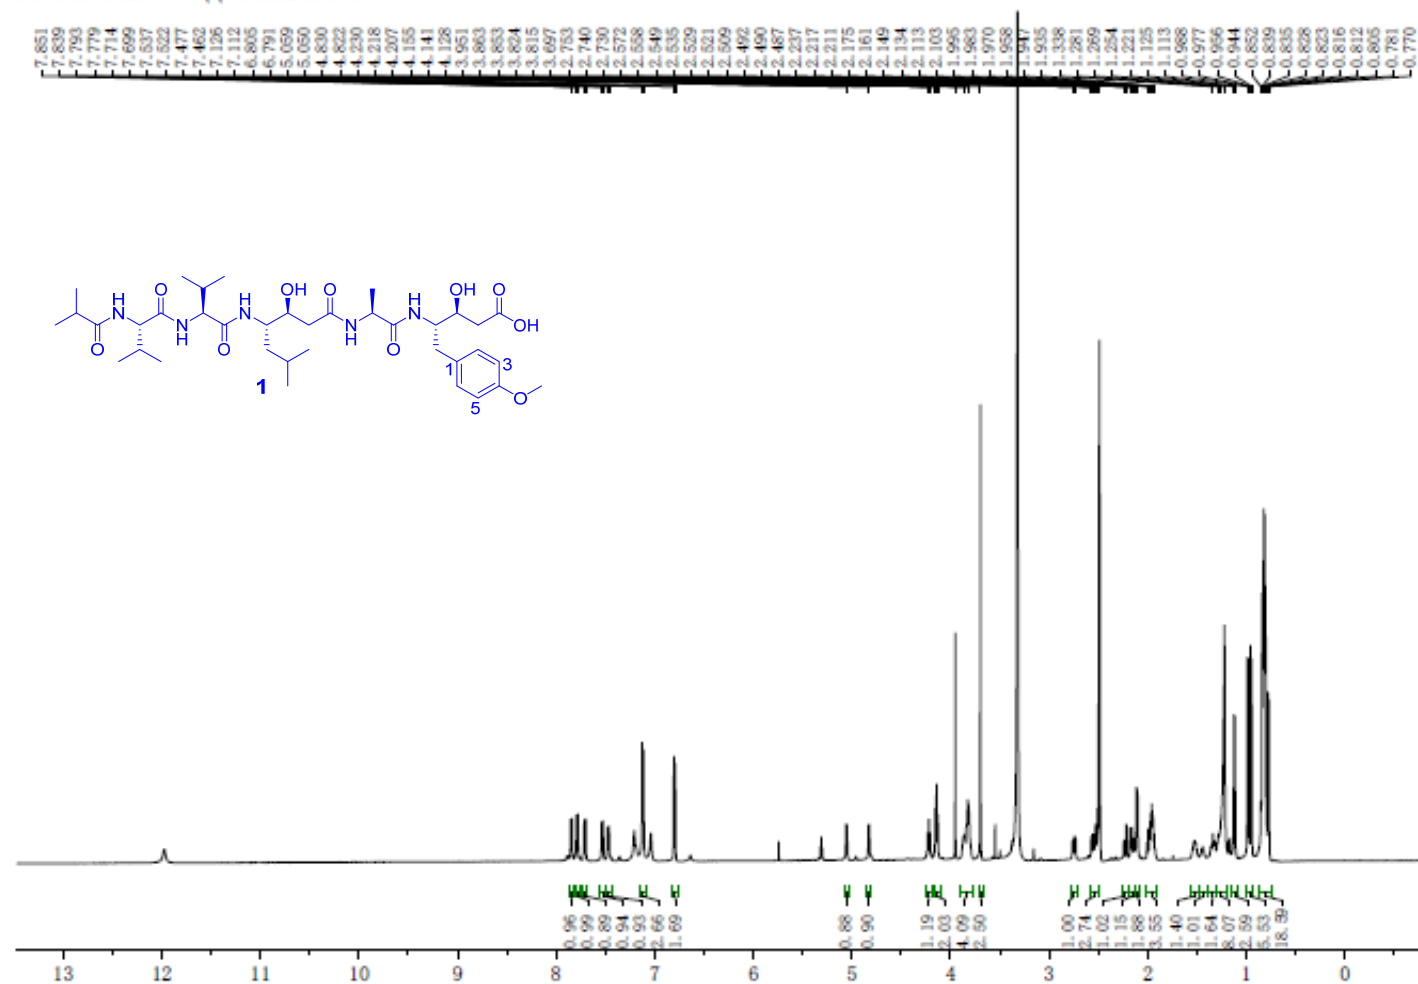

**Figure S3.** The <sup>1</sup>H NMR Spectrum of Compound **1** in DMSO-*d*<sub>6</sub>

20160408 CSS-26  
 Bruker AVIIIHD 600 20160408  
 C13 DMSO D:\ DATA2016 29

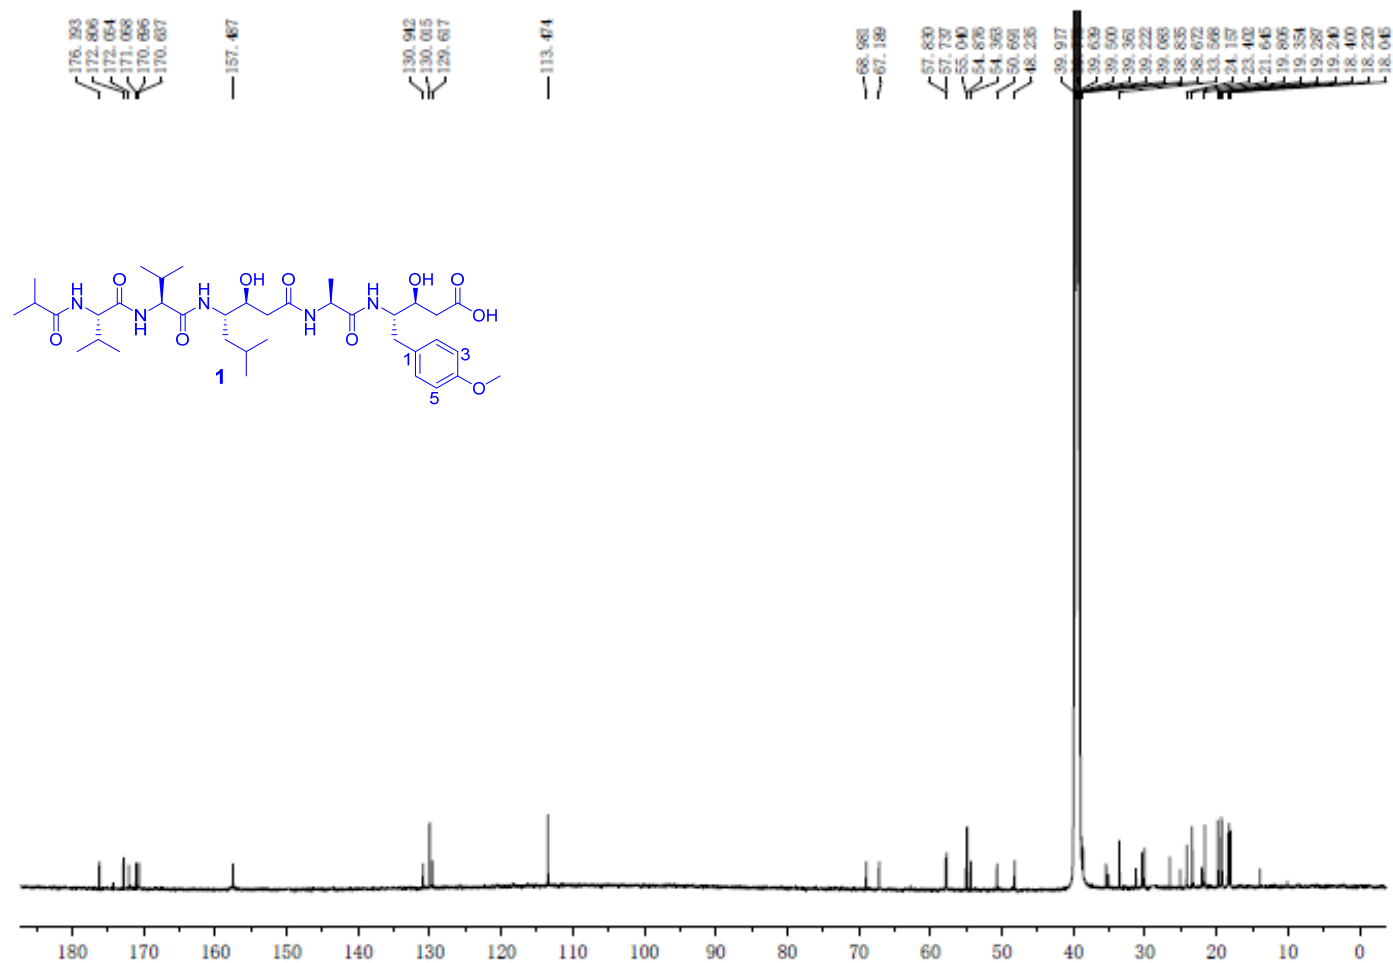

**Figure S4.** The  $^{13}\text{C}$  NMR Spectrum of Compound 1 in  $\text{DMSO}-d_6$

**1**

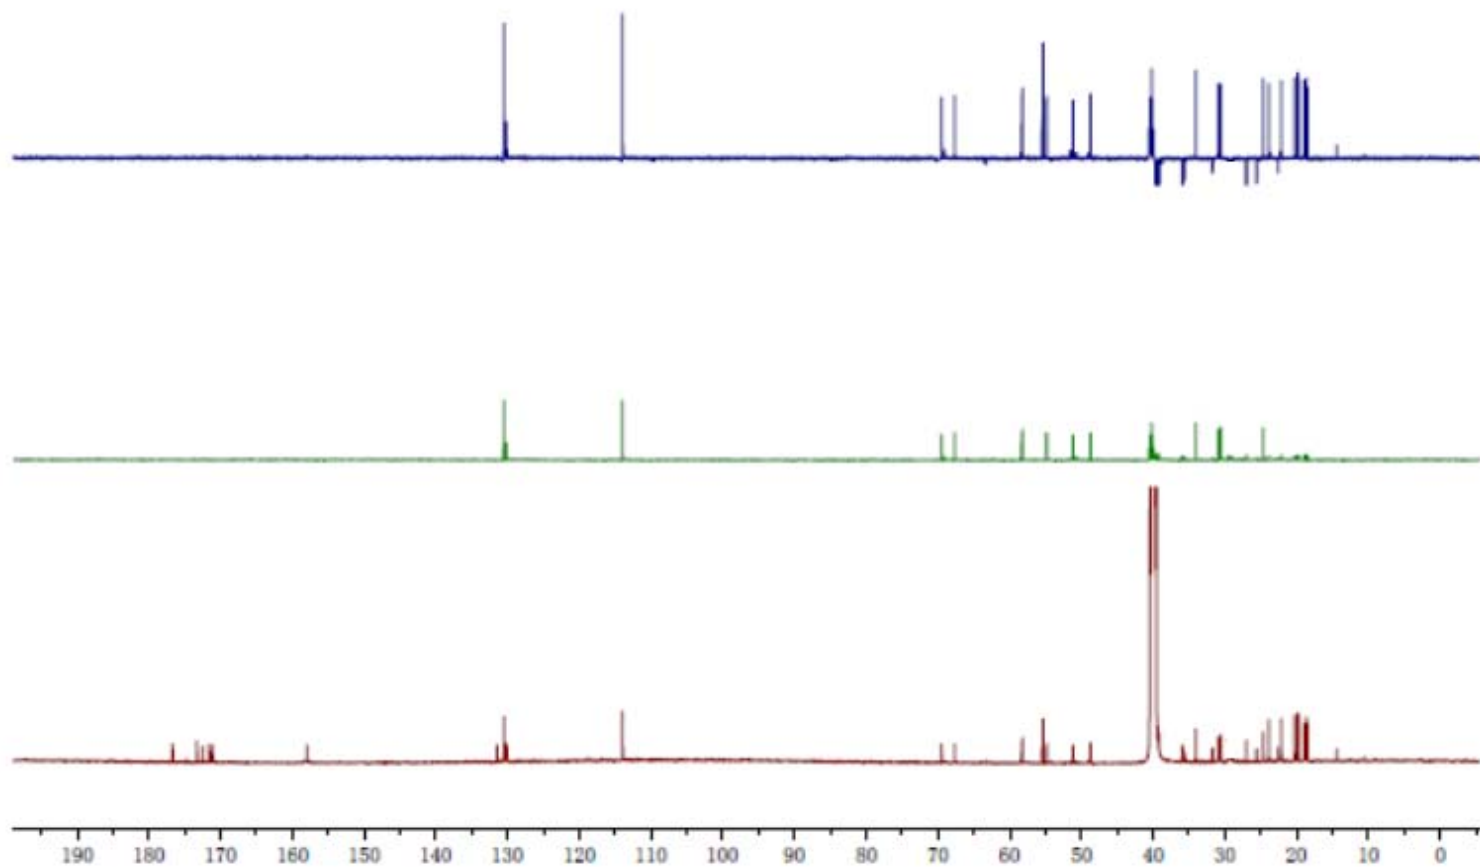

S7

20160425 CSS-26  
Bruker AVIIIHD 600 20160425  
COSY\_MQF DMSO D:\ DATA2016 17

Chemical structure of compound 1 is shown in the bottom right corner of the plot area:

CC(C)C(O)C(=O)NC(C)C(=O)NC(C)C(=O)NC(C)C(=O)O

**Figure S6.** The  $^1\text{H}$ - $^1\text{H}$ COSY Spectrum of Compound **1** in  $\text{DMSO}-d_6$



[illegible]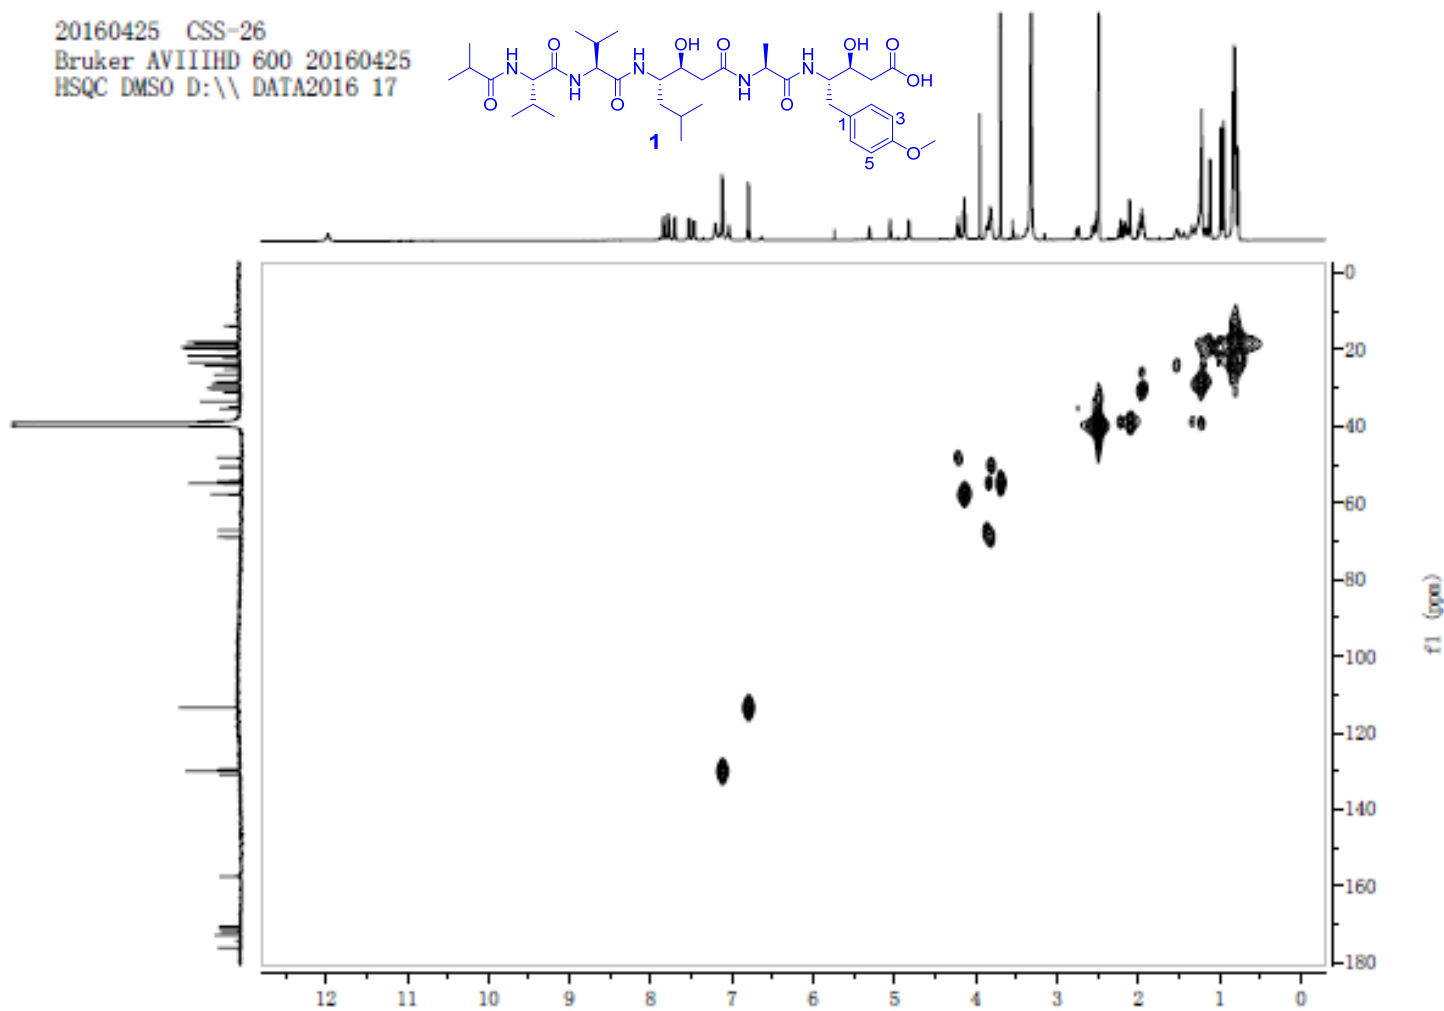

S9

20160628 CSS-26  
Bruker AVIIIHD 600 20160628  
HMBC DMSO D:\ DATA2016 54

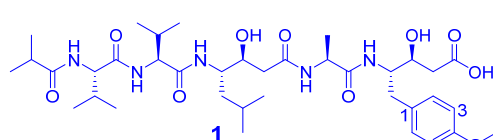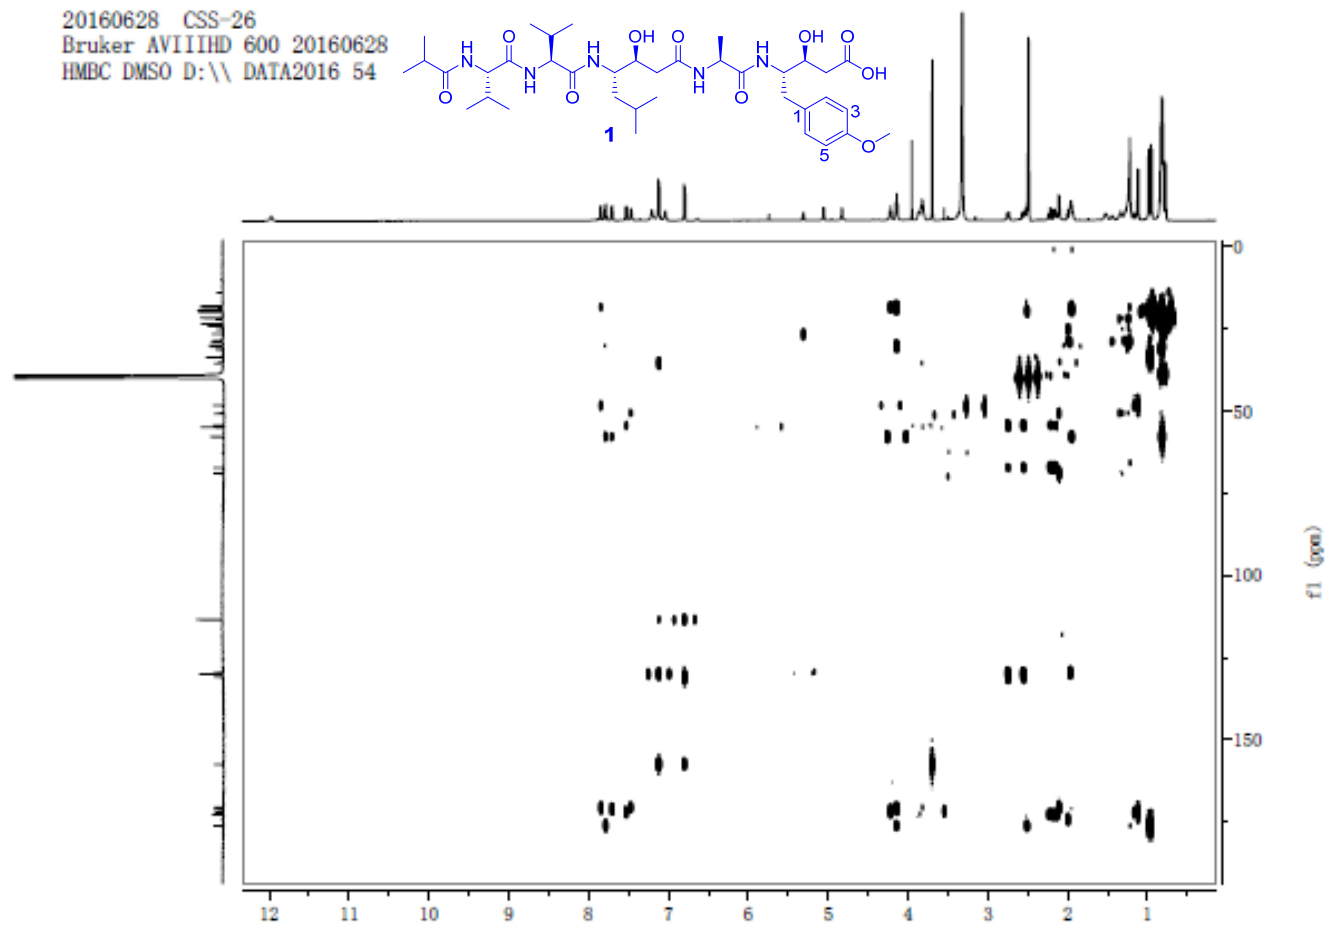

**Figure S8.** The HMBC Spectrum of Compound **1** in DMSO- $d_6$



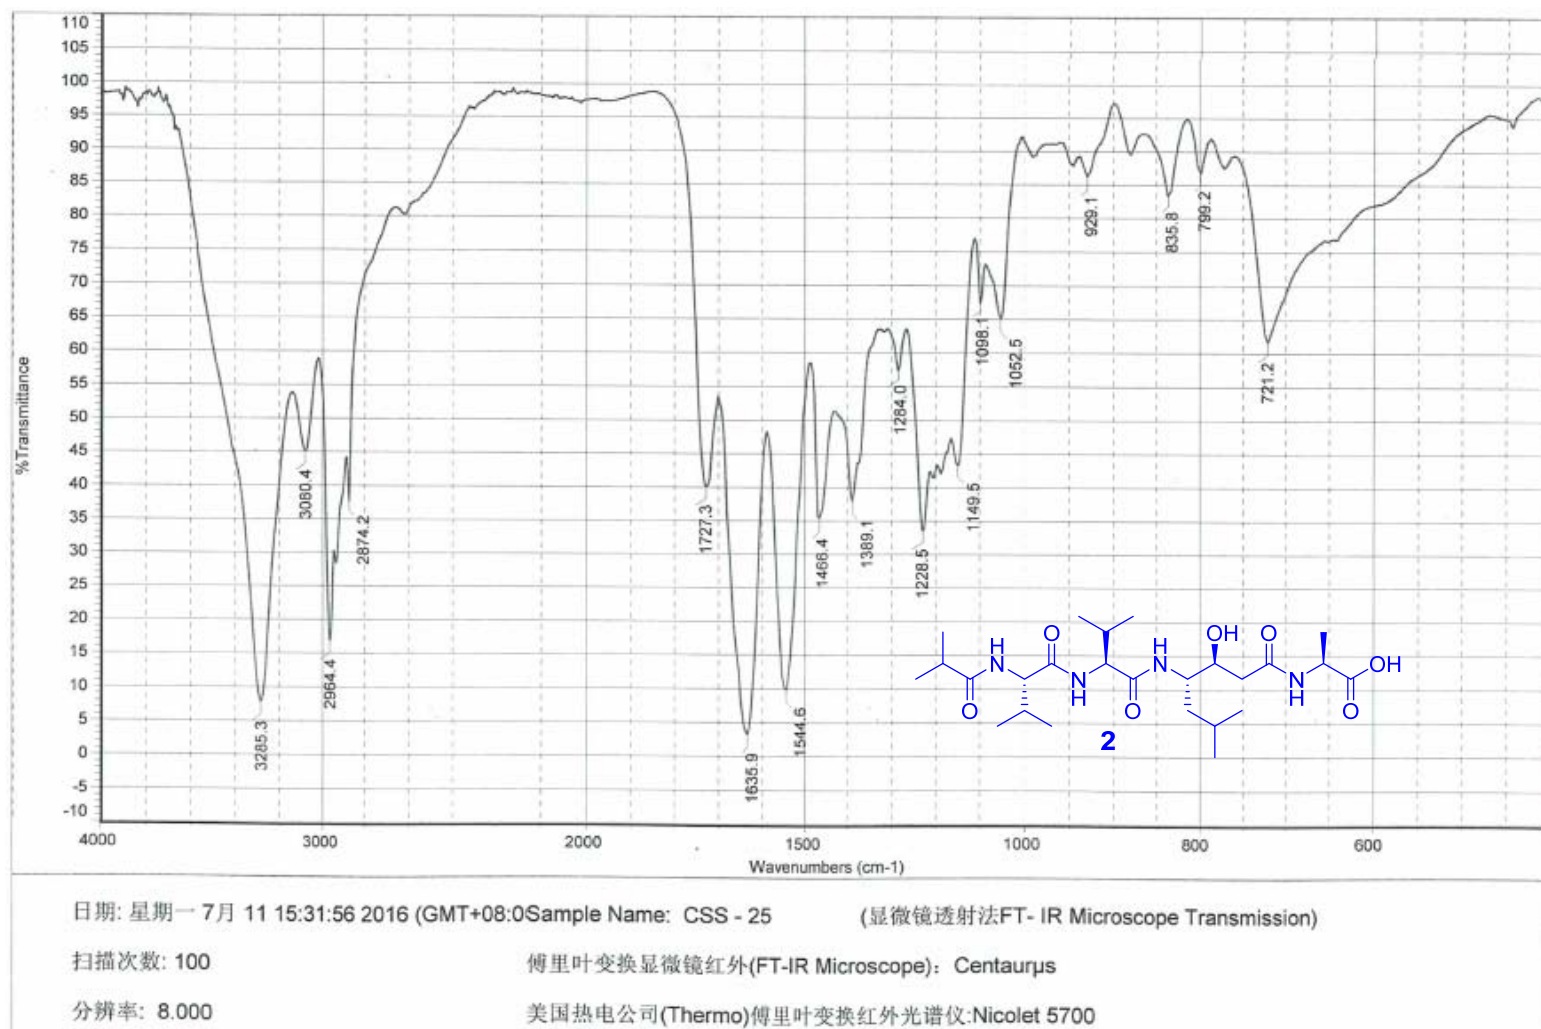

**Figure S10.** The IR Spectrum of Compound 2

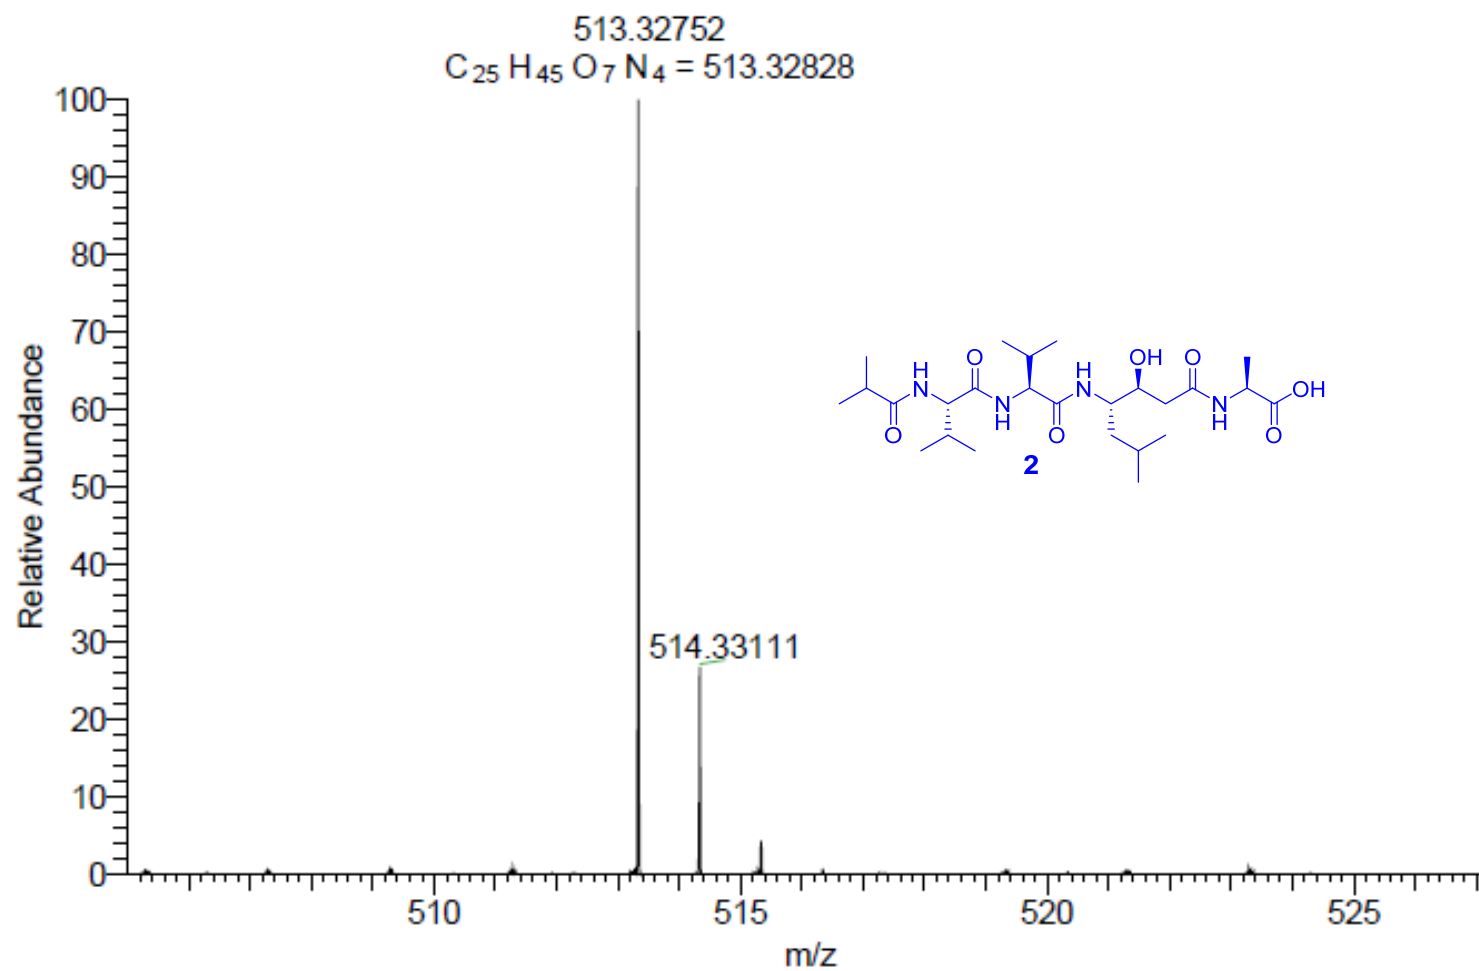

**Figure S11.** The (-)-HRESIMS Spectroscopic of Compound **2**

20160113 CSS-25  
 Bruker AVIIIHD 600 20160113  
 PROTON DMSO D:\ DATA2016 20

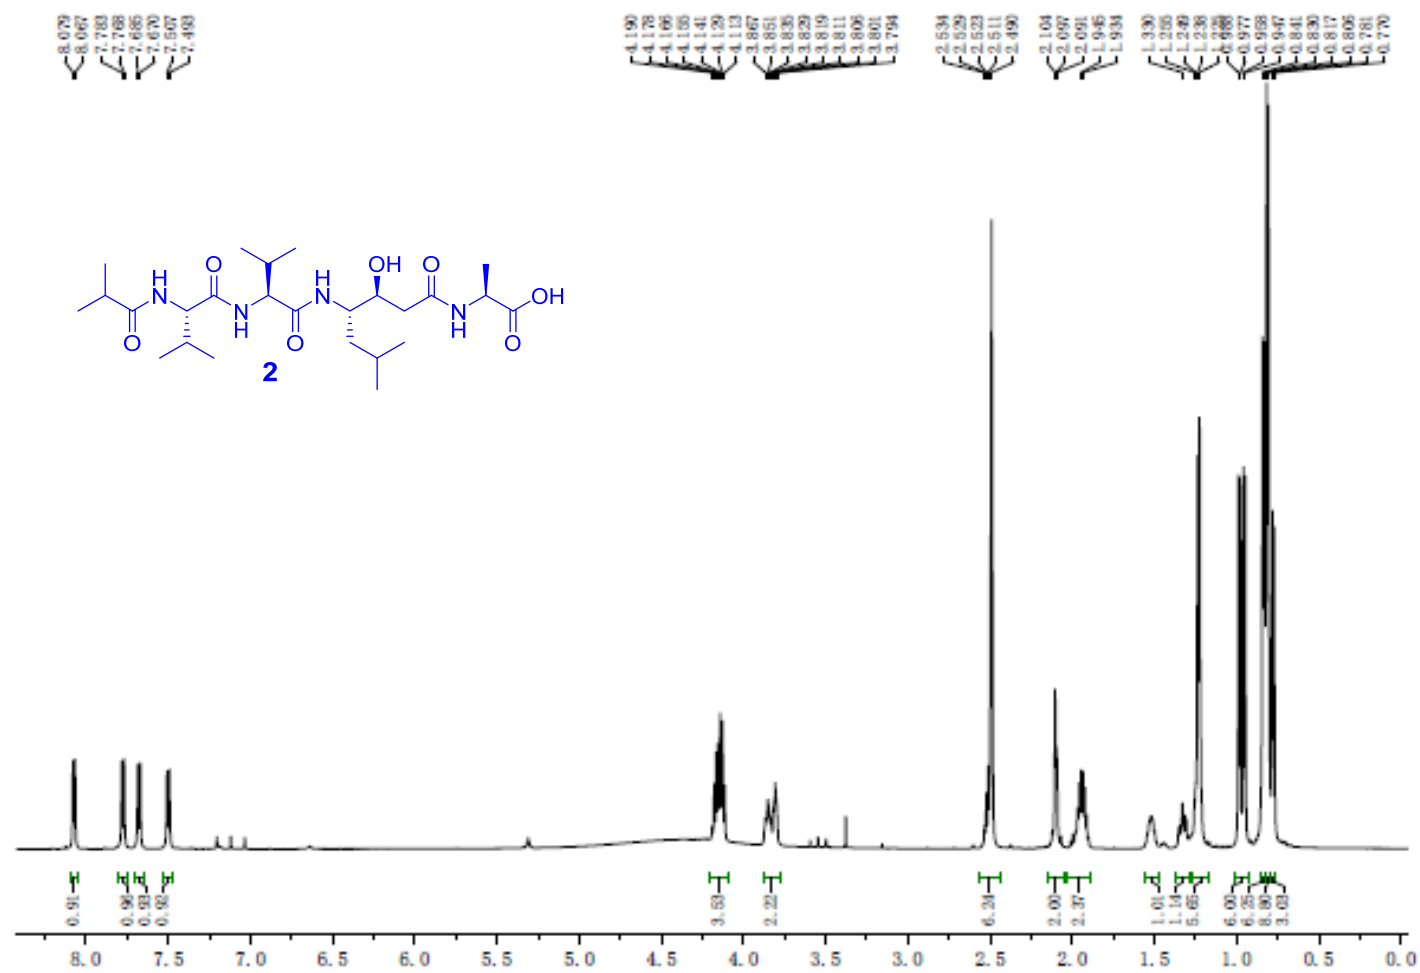

**Figure S12.** The <sup>1</sup>H NMR Spectrum of Compound **2** in DMSO-*d*<sub>6</sub>

20160116 CSS-25  
 Bruker AVIIIHD 600 20160116  
 C13 DMSO D:\ DATA2016 48

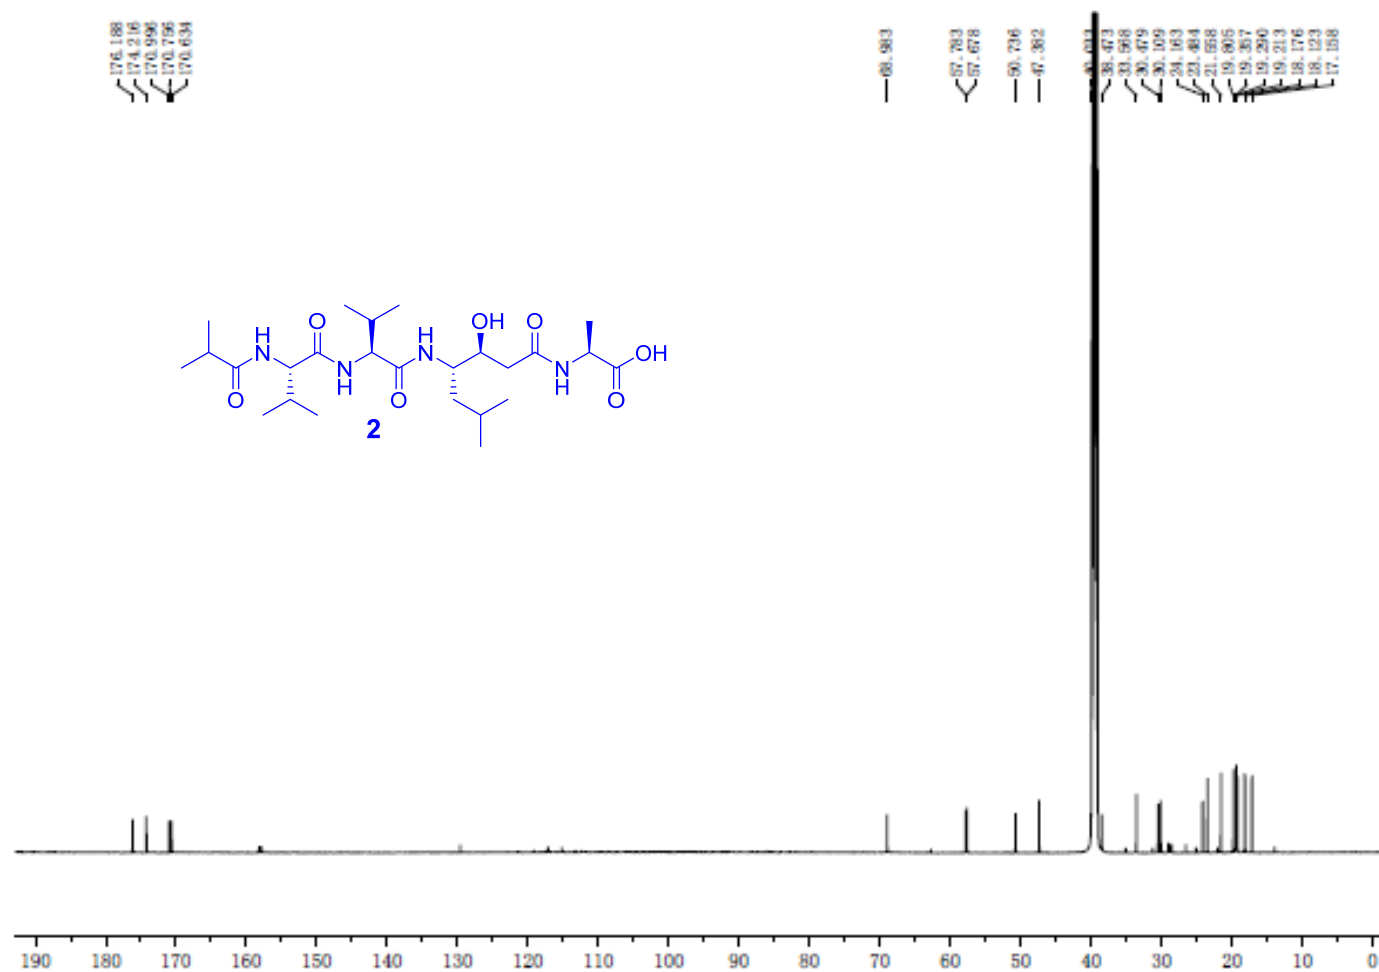

**Figure S13.** The <sup>13</sup>C NMR Spectrum of Compound **2** in DMSO-*d*<sub>6</sub>

20160116 CSS-25  
Bruker AVIIIHD 600 20160116  
DEPT90/135 DMSO D:\ DATA2016 48

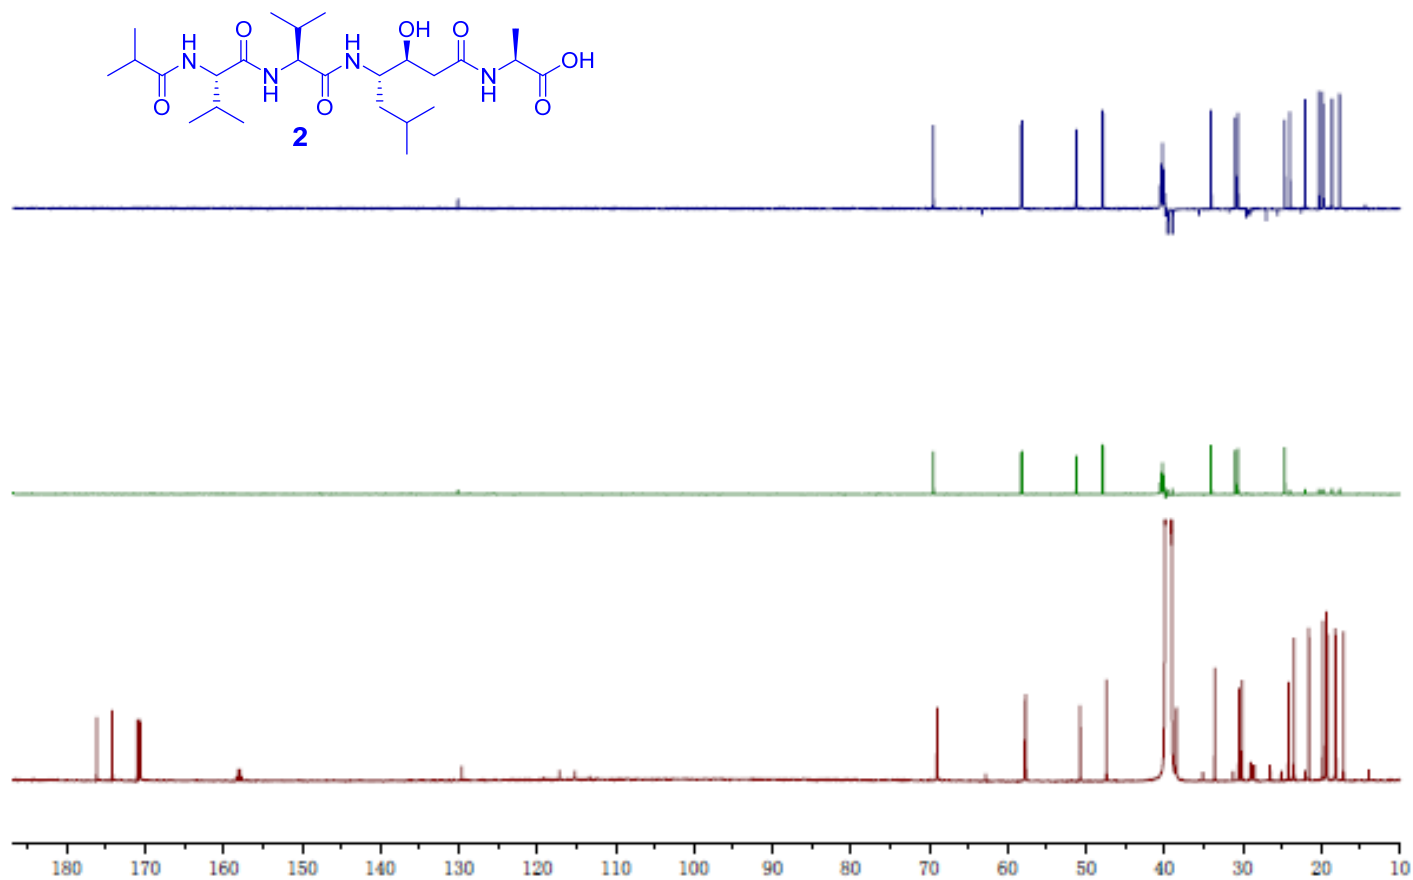

**Figure S14.** The DEPT Spectrum of Compound **2** in DMSO- $d_6$



20160122 CSS-25  
Bruker AVIIIHD 600 20160122  
COSY\_MQF DMSO D:\ DATA2016 32

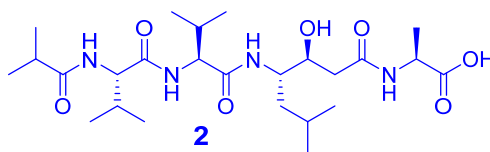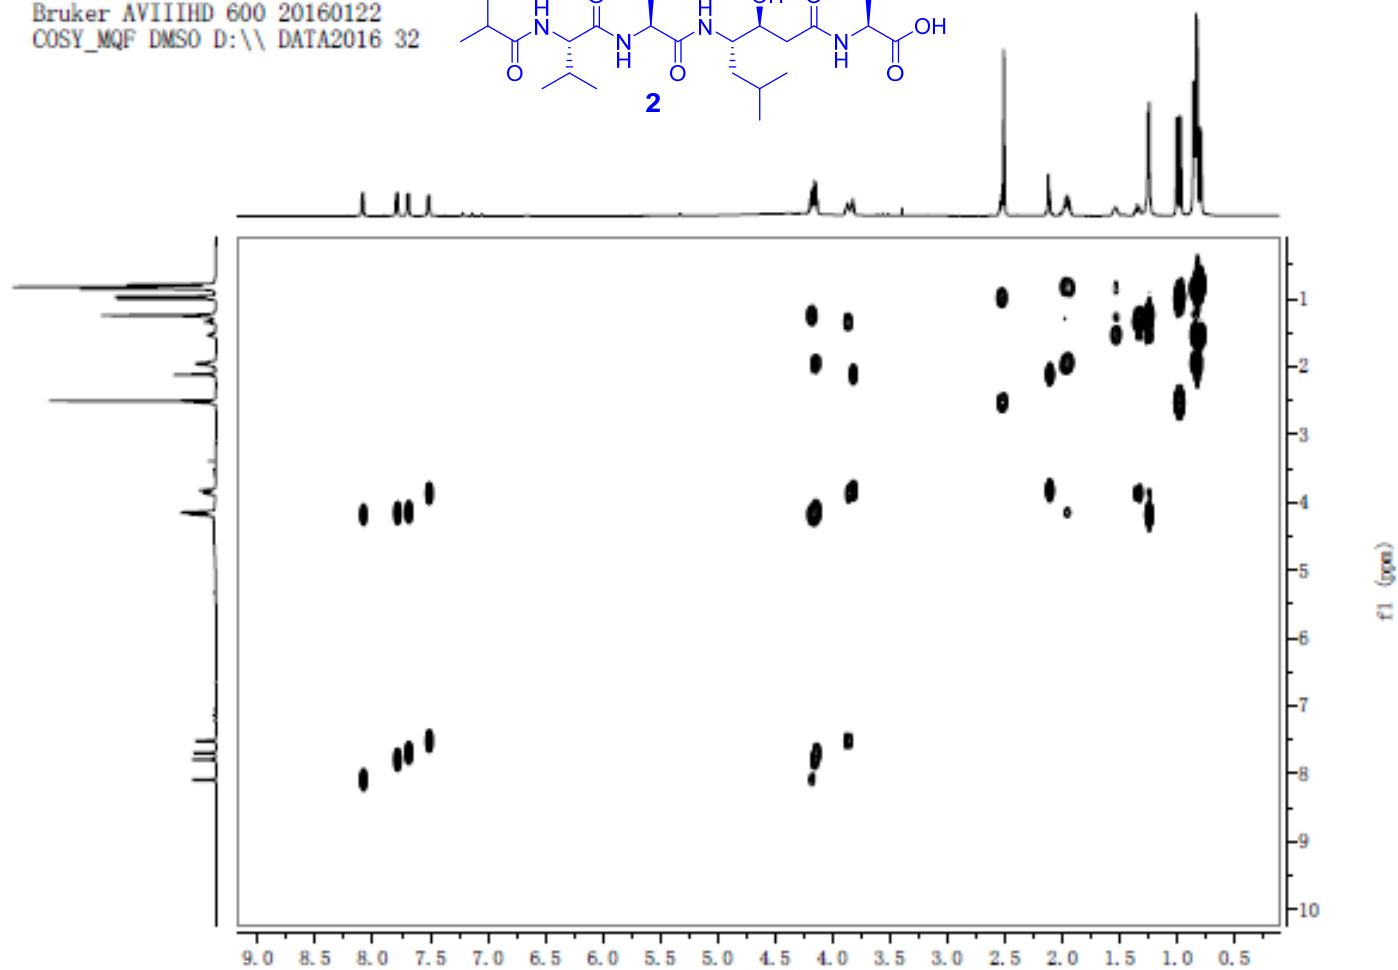

**Figure S15.** The  $^1\text{H}$ - $^1\text{H}$  COSY Spectrum of Compound **2** in  $\text{DMSO}-d_6$

20160122 CSS-25  
Bruker AVIIIHD 600 20160122  
HSQC DMSO D:\ DATA2016 32

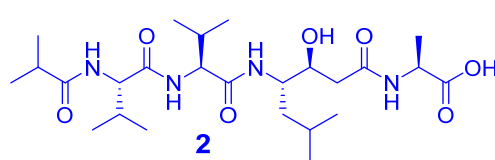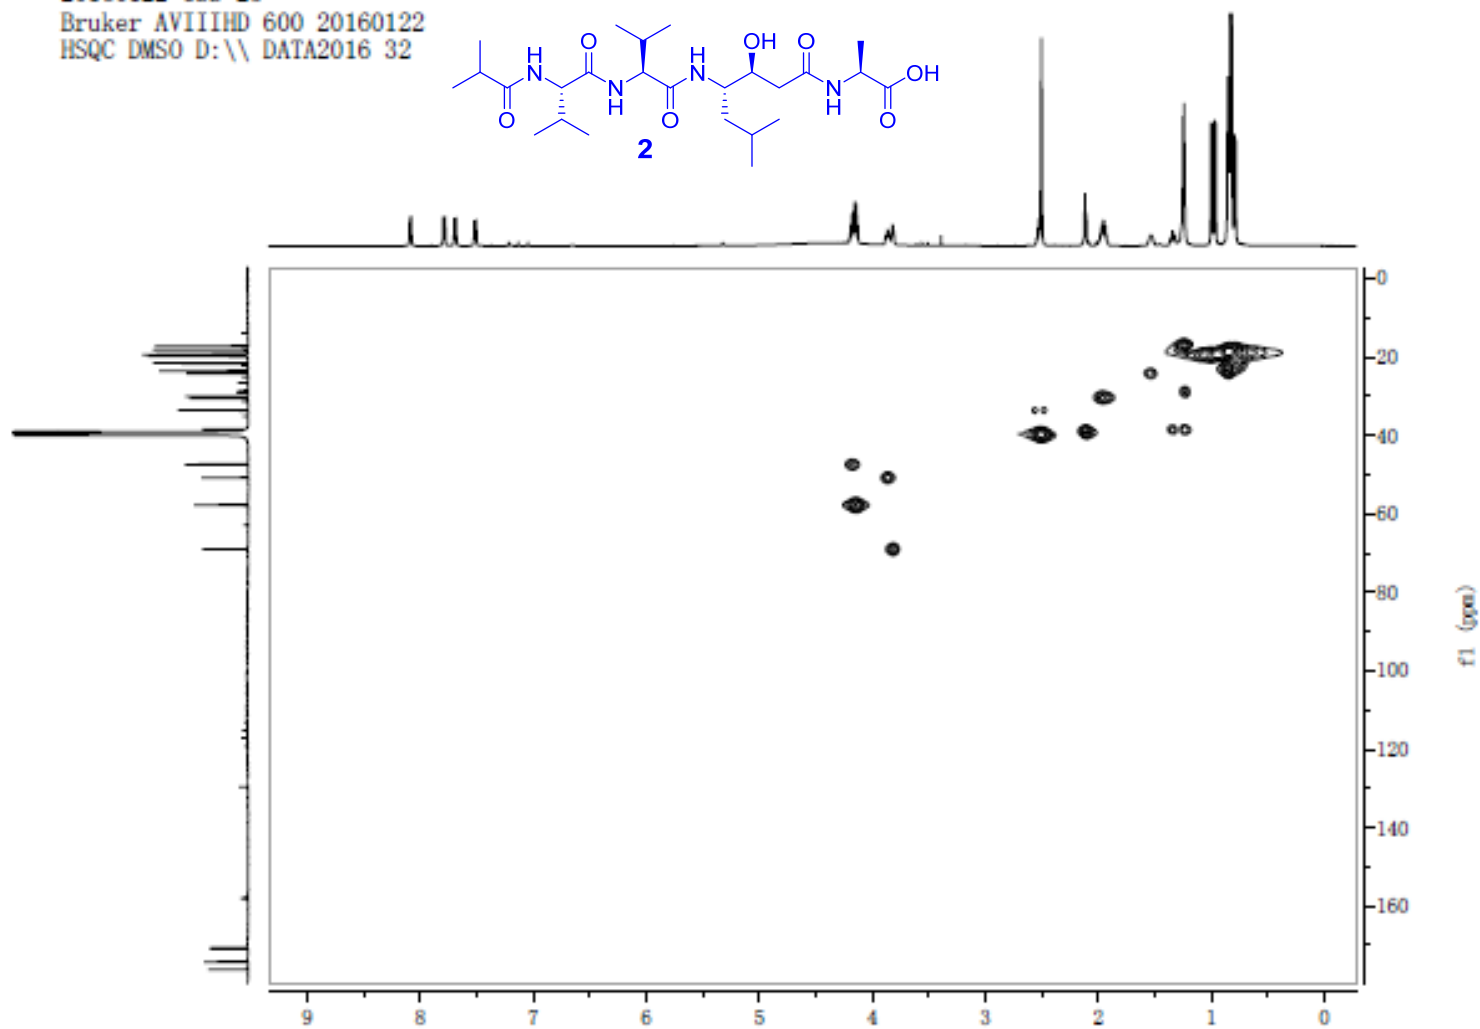

**Figure S17.** The HSQC Spectrum of Compound **2** in DMSO-*d*<sub>6</sub>

20160122 CSS-25  
Bruker AVIIIHD 600 20160122  
HMBC DMSO D:\ DATA2016 32

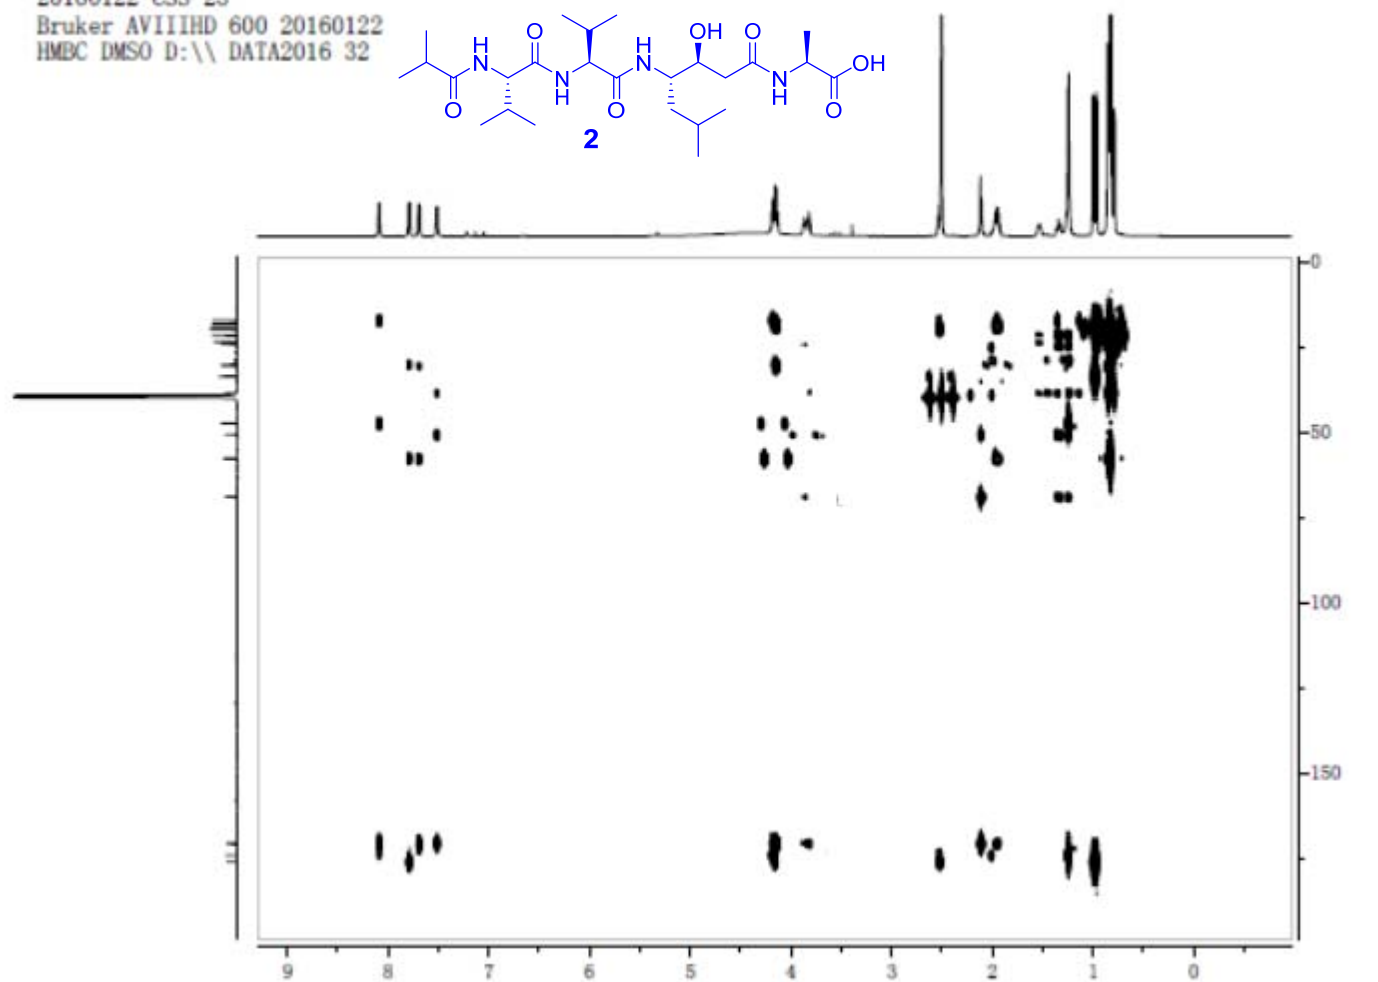

**Figure S17.** The HMBC Spectrum of Compound 2 in DMSO- $d_6$

Bruker AVIIIHD 600 20160122  
NOESY\_2D DMSO D:\ DATA2016 32

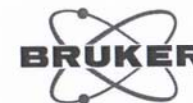

Current Data Parameters  
NAME 20160122 CSS-25  
EXPNO 3  
PROCNO 1

F2 - Acquisition Parameters  
Date\_ 20160125  
Time 2.00  
INSTRUM spect  
PROBHD 5 mm CPDCH 13C  
PULPROG noesygppbpb  
TD 2048  
SOLVENT DMSO  
NS 16  
DS 16  
SWH 8417.509 Hz  
FIDRES 4.110112 Hz  
AQ 0.1216512 sec  
RG 144  
DW 59.400 usec  
DE 20.00 usec  
TE 298.0 K  
DO 0.00004476 sec  
D1 1.20000005 sec  
D8 0.60000002 sec  
D11 0.03000000 sec  
D12 0.00002000 sec  
D16 0.00020000 sec  
IN0 0.00011880 sec

===== CHANNEL f1 =====  
SFO1 600.2539016 MHz  
NUC1 1H  
P1 11.50 usec  
P2 23.00 usec  
P17 2500.00 usec  
PLW1 12.93200016 W  
PLW0 2.52999997 W

===== GRADIENT CHANNEL =====  
GPNAM[1] SMSQ10.100  
GPE1 40.00 %  
P16 1000.00 usec

F1 - Acquisition parameters  
TD 160  
SFO1 600.2539 MHz  
FIDRES 52.609428 Hz  
SW 14.023 ppm  
PRMODE States-TPPI

F2 - Processing parameters  
SI 1024  
SF 600.2500000 MHz  
WDW QSINE  
SSB 2  
LB 0 Hz  
GB 0  
PC 1.00

F1 - Processing parameters  
SI 1024  
MC2 States-TPPI  
SF 600.2500000 MHz  
WDW QSINE  
SSB 2  
LB 0 Hz  
GB 0

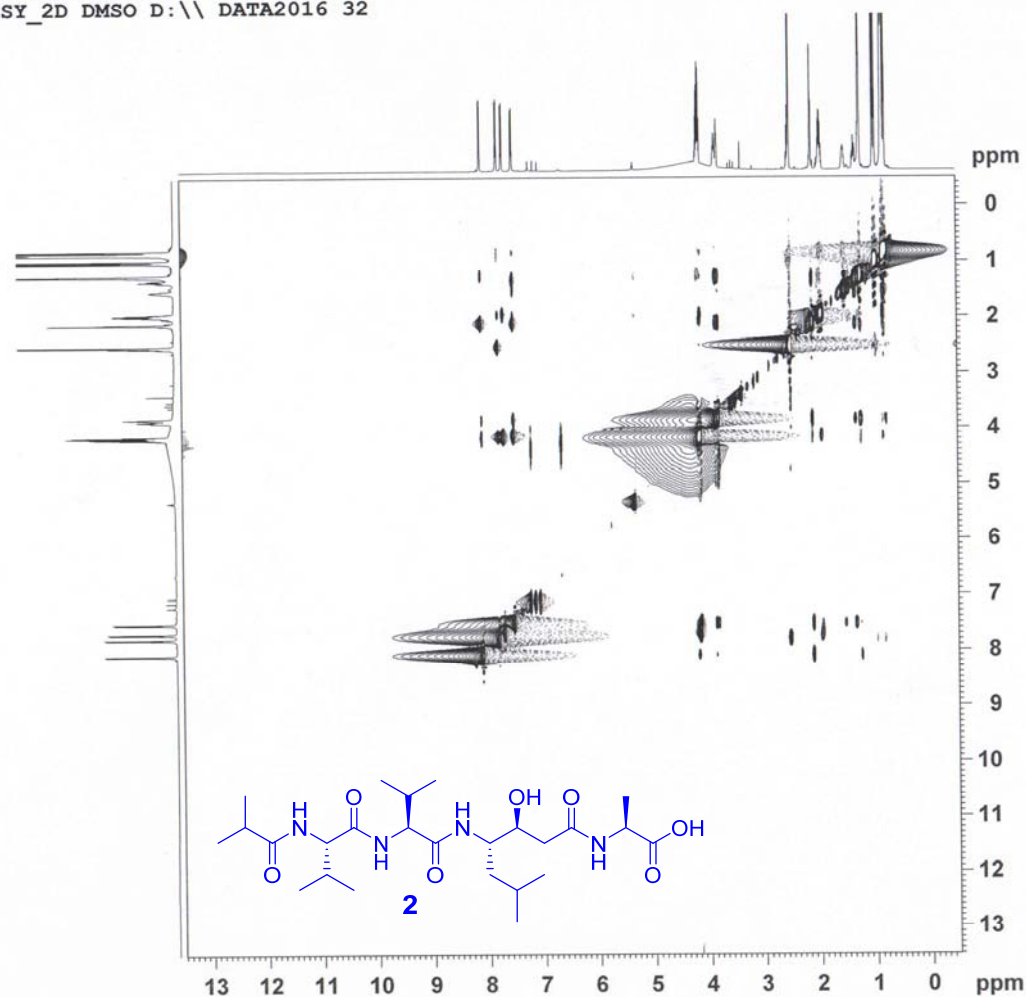

Figure S18. The NOESY Spectrum of Compound 1 in DMSO- $d_6$

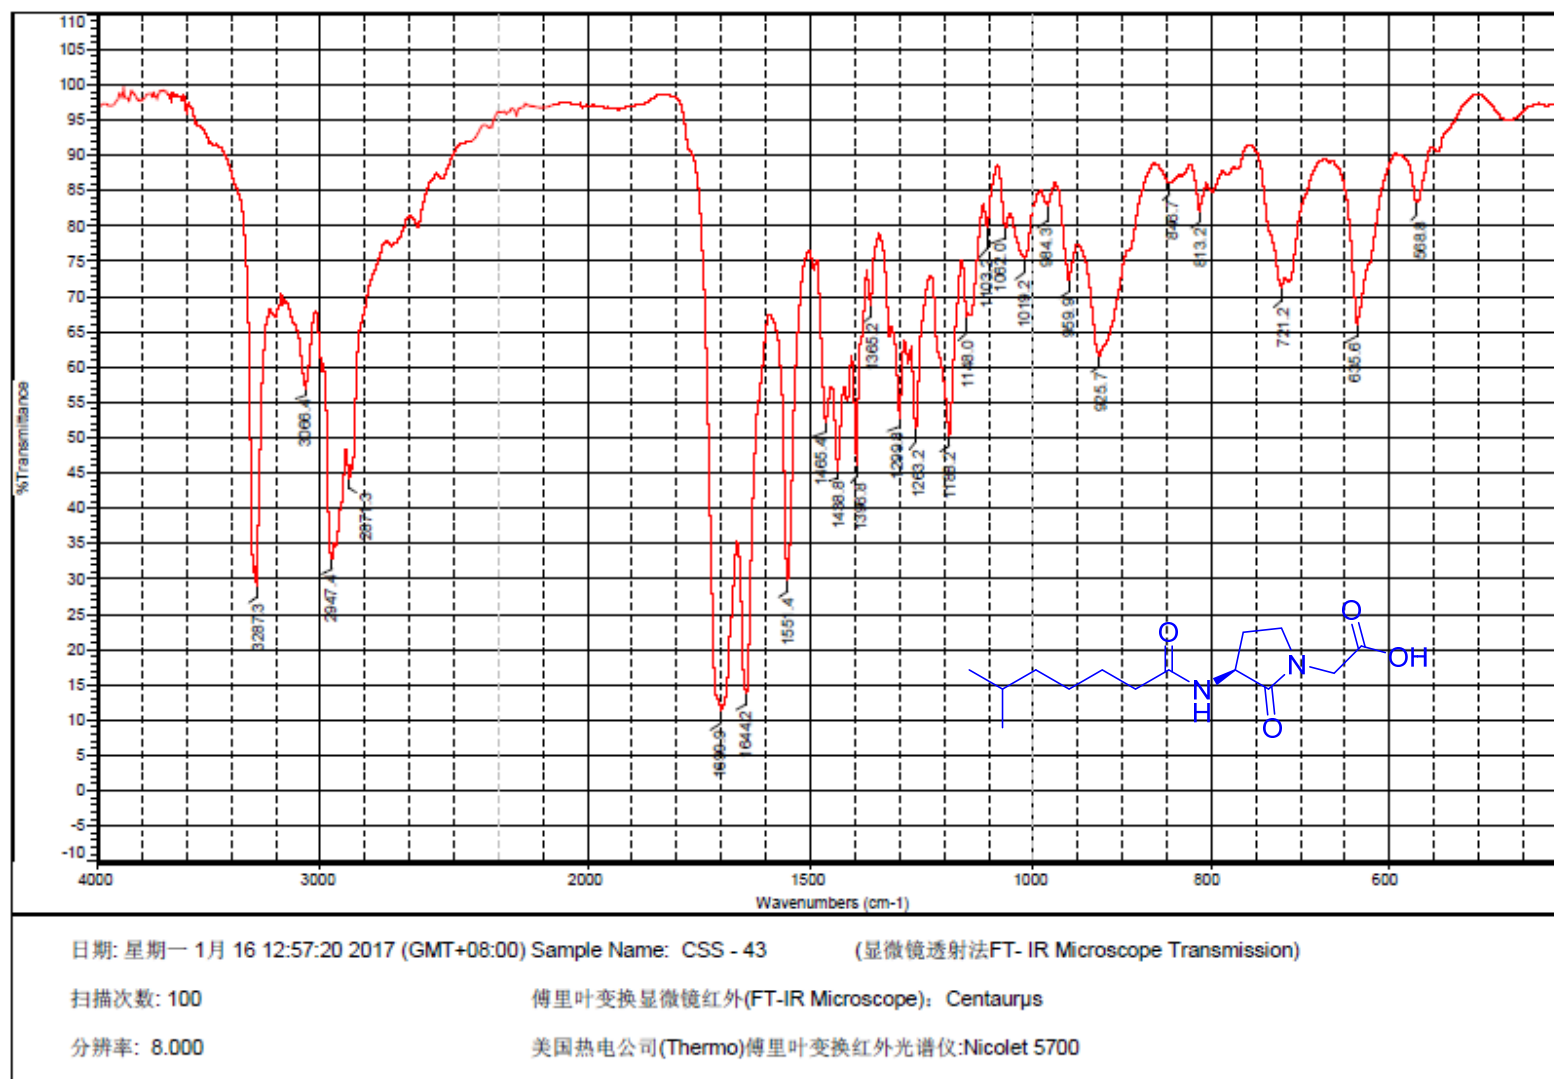

**Figure S19.** The IR Spectrum of Compound 3

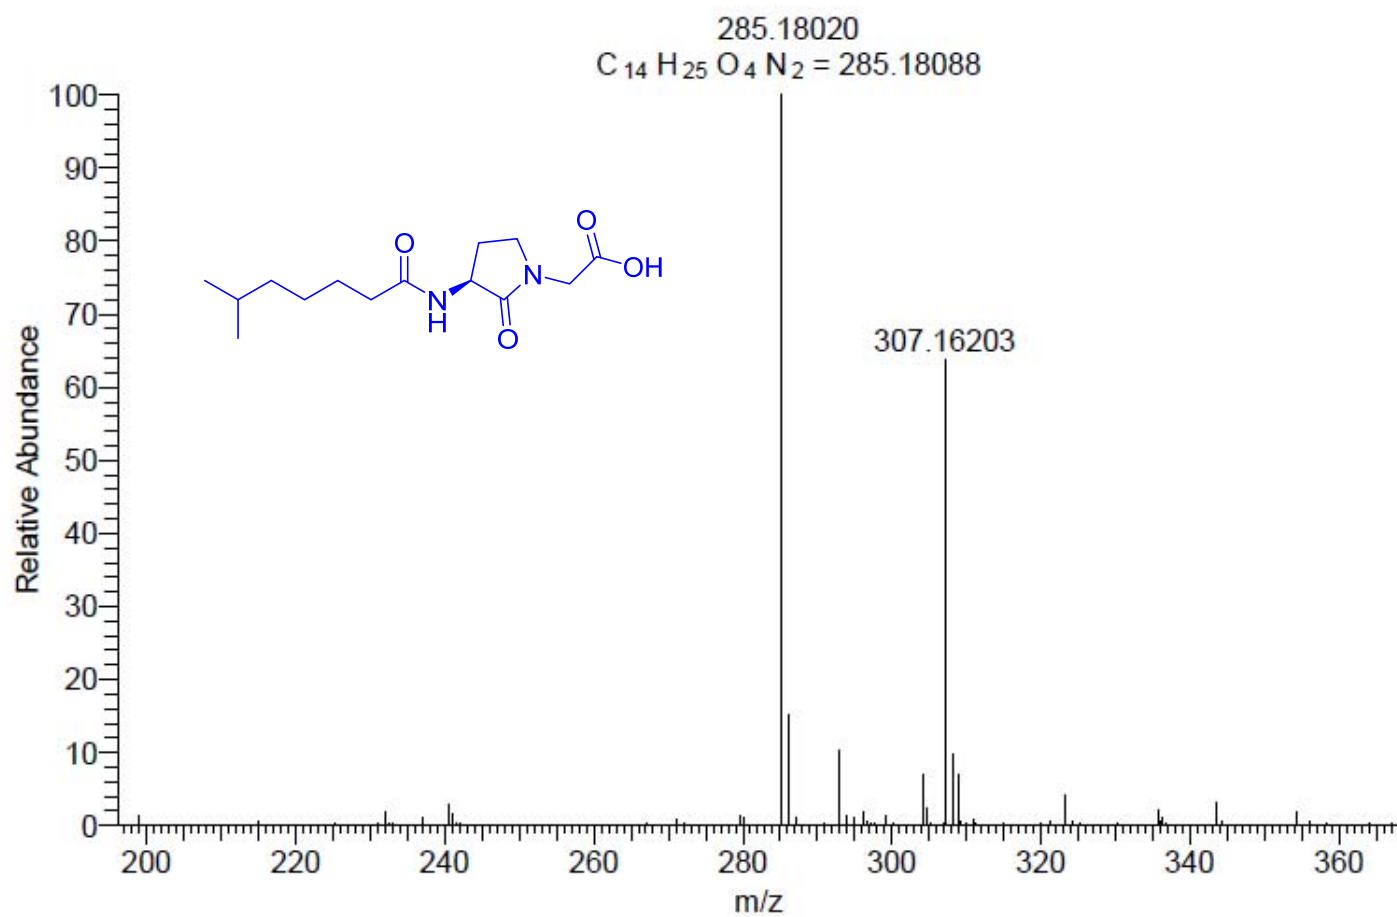

**Figure S20.** The (+)-HRESIMS Spectroscopic Data of Compound **3**

20160829 css-43  
 Bruker AVIIIHD 600 20160829  
 PROTON DMSO D:\ DATA2016 9

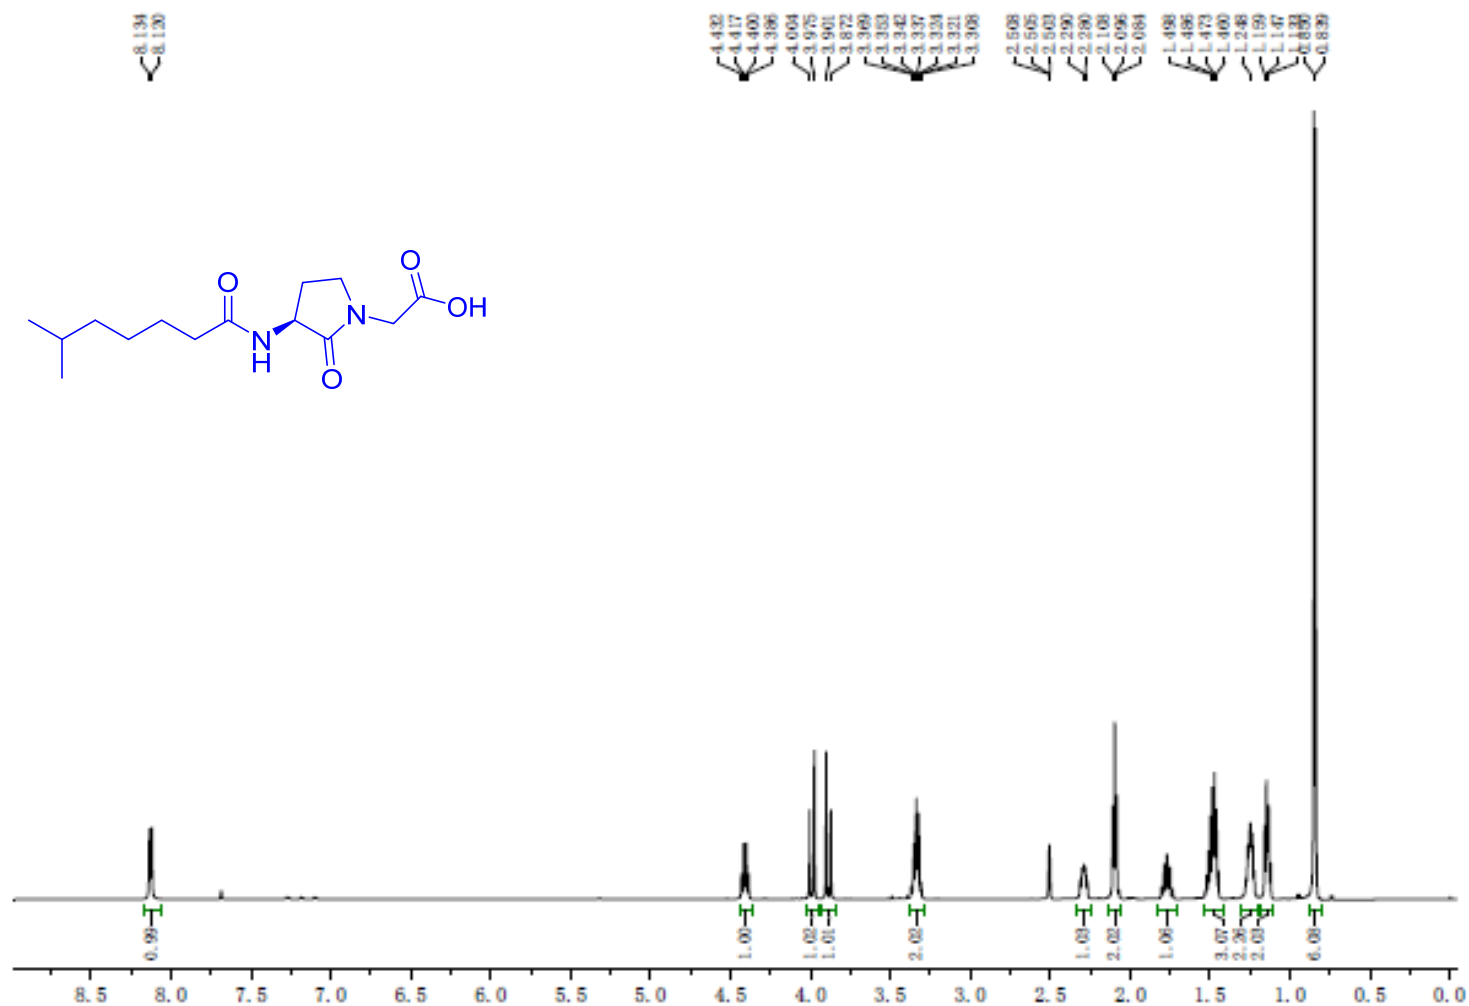

**Figure S21.** The <sup>1</sup>H NMR Spectrum of Compound **3** in DMSO-*d*<sub>6</sub>

20160831 CSS-43  
Bruker AVIIIHD 600 20160831  
C13 CD3OD D:\ DATA2016 53

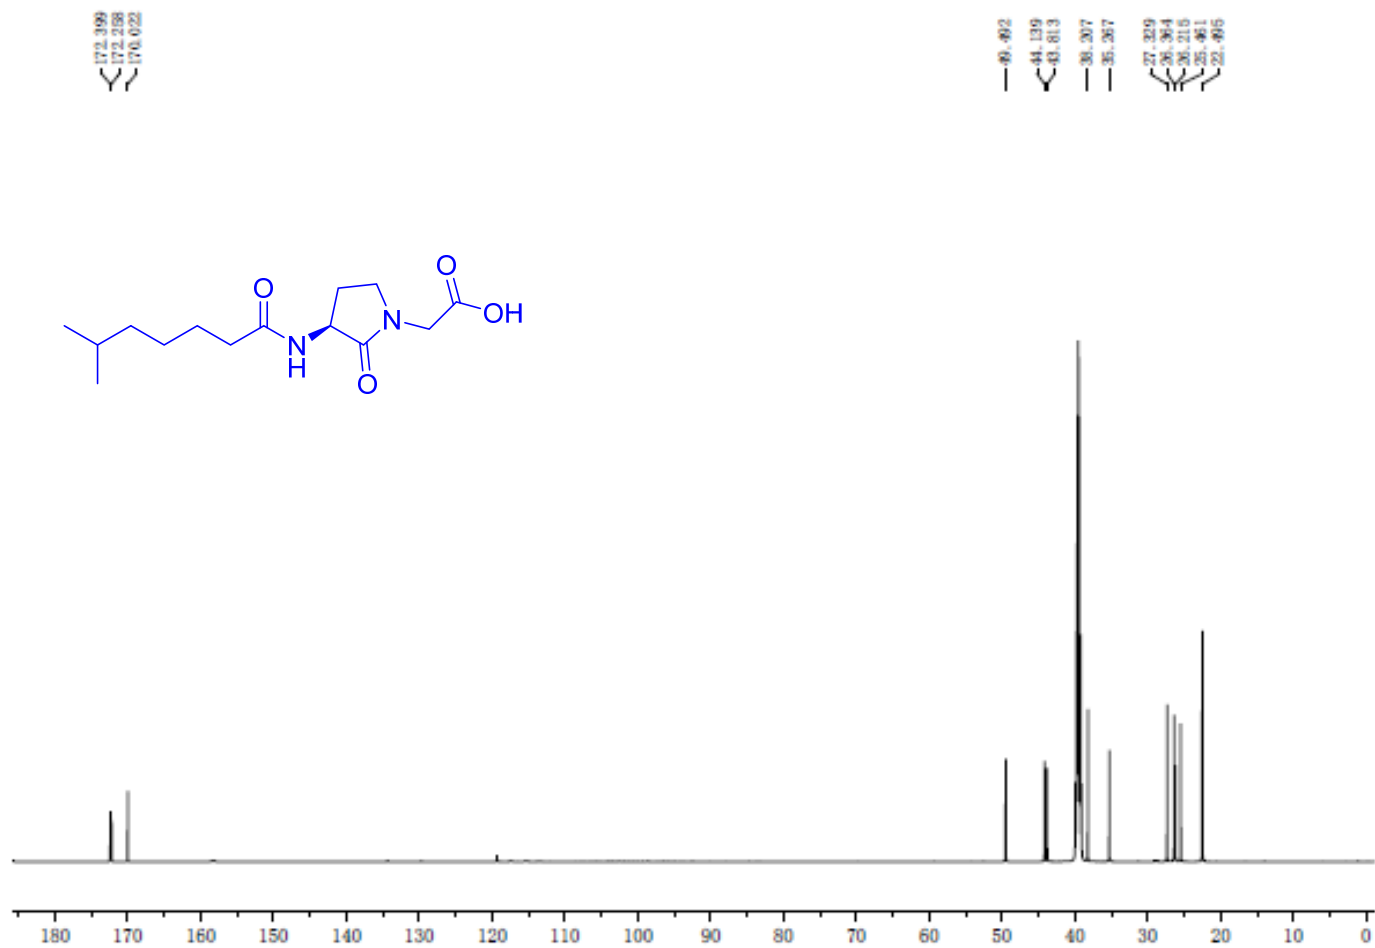

**Figure S22.** The <sup>13</sup>C NMR Spectrum of Compound **3** in DMSO-*d*<sub>6</sub>



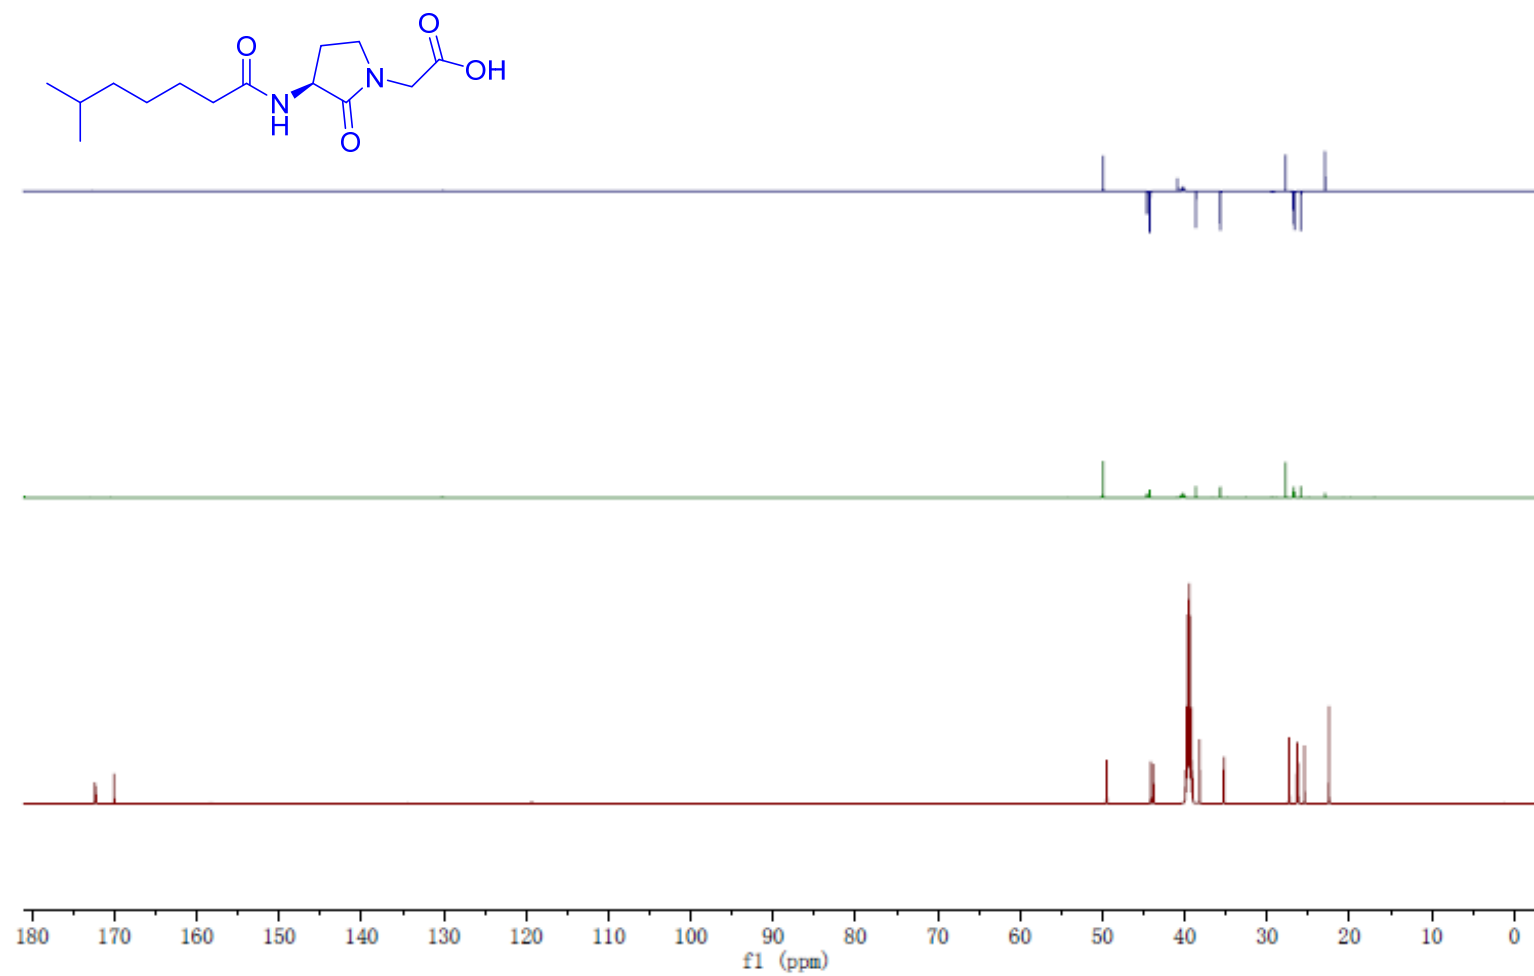

**Figure S23.** The DEPT Spectrum of Compound **3** in DMSO- $d_6$

20160914 CSS-43  
Bruker AVIIIHD 600 20160914  
COSY\_MQF DMSO D:\ DATA2016 12

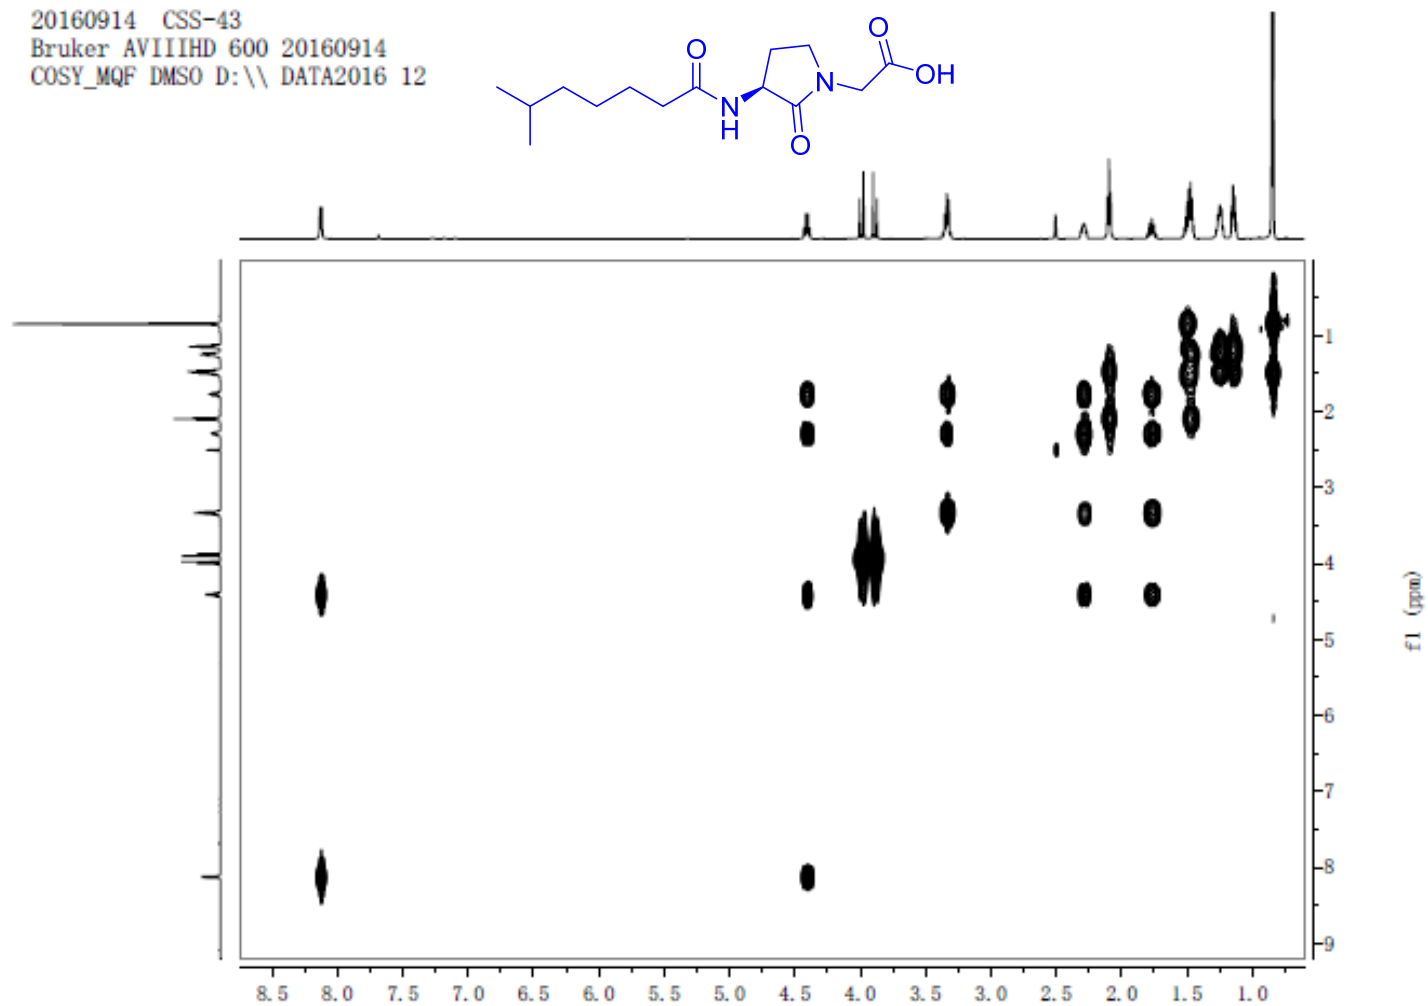

**Figure S24.** The  $^1\text{H}$ - $^1\text{H}$  COSY Spectrum of Compound **3** in  $\text{DMSO}-d_6$

20160914 CSS-43  
Bruker AVIIIHD 600 20160914  
HSQC DMSO D:\ DATA2016 12

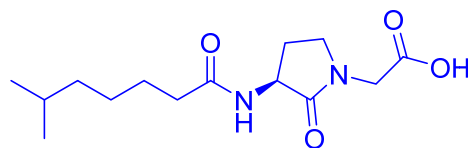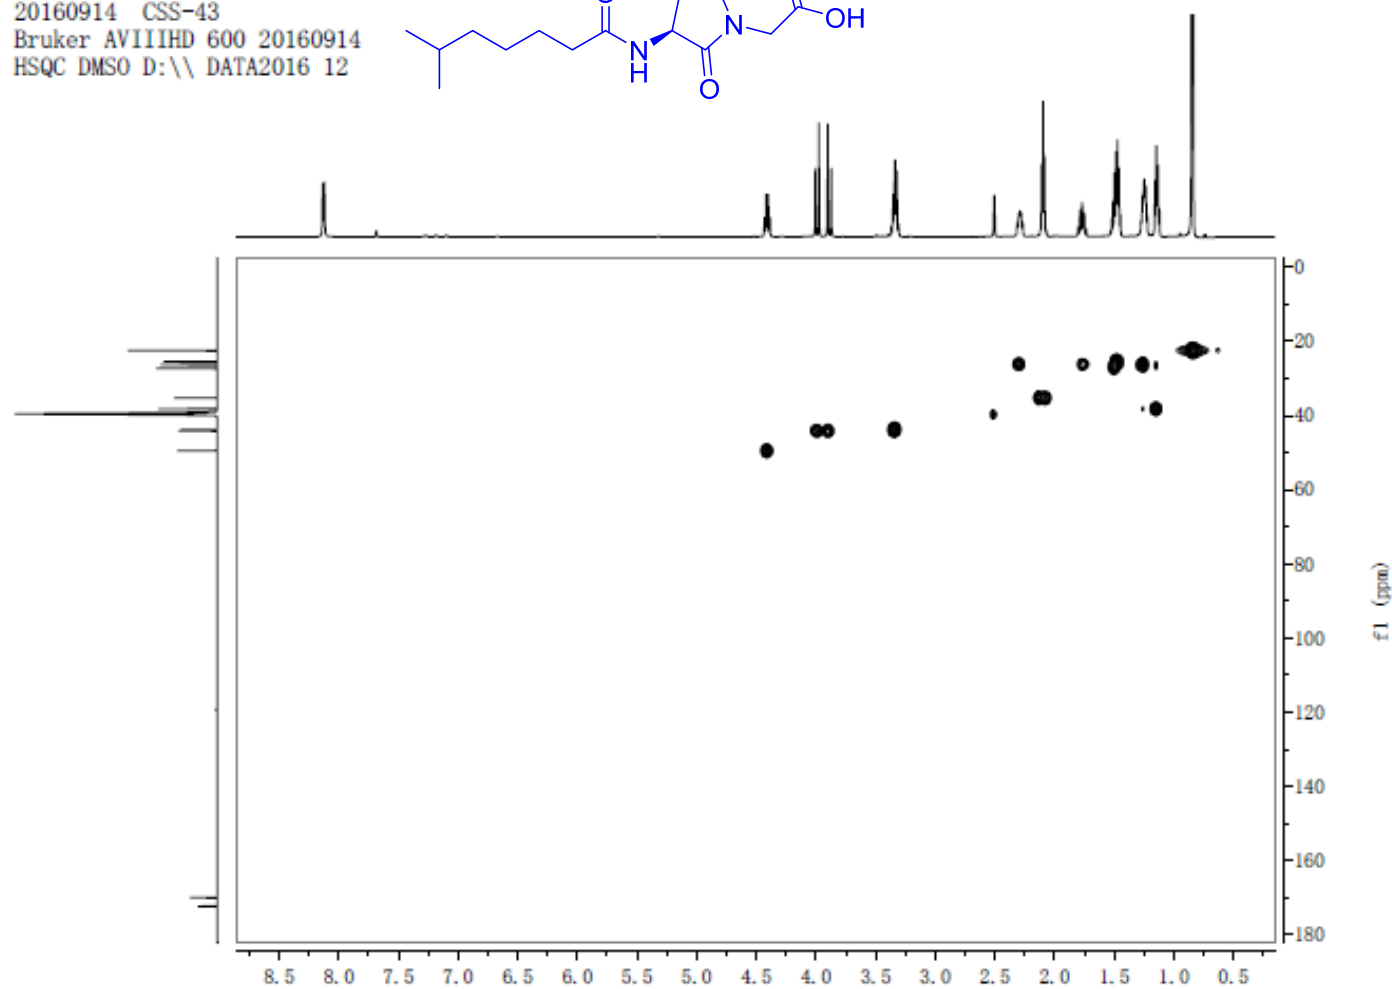

**Figure S25.** The HSQC Spectrum of Compound **3** in  $\text{DMSO}-d_6$

20160914 CSS-43  
Bruker AVIIIHD 600 20160914  
HMBC DMSO D:\ DATA2016 12

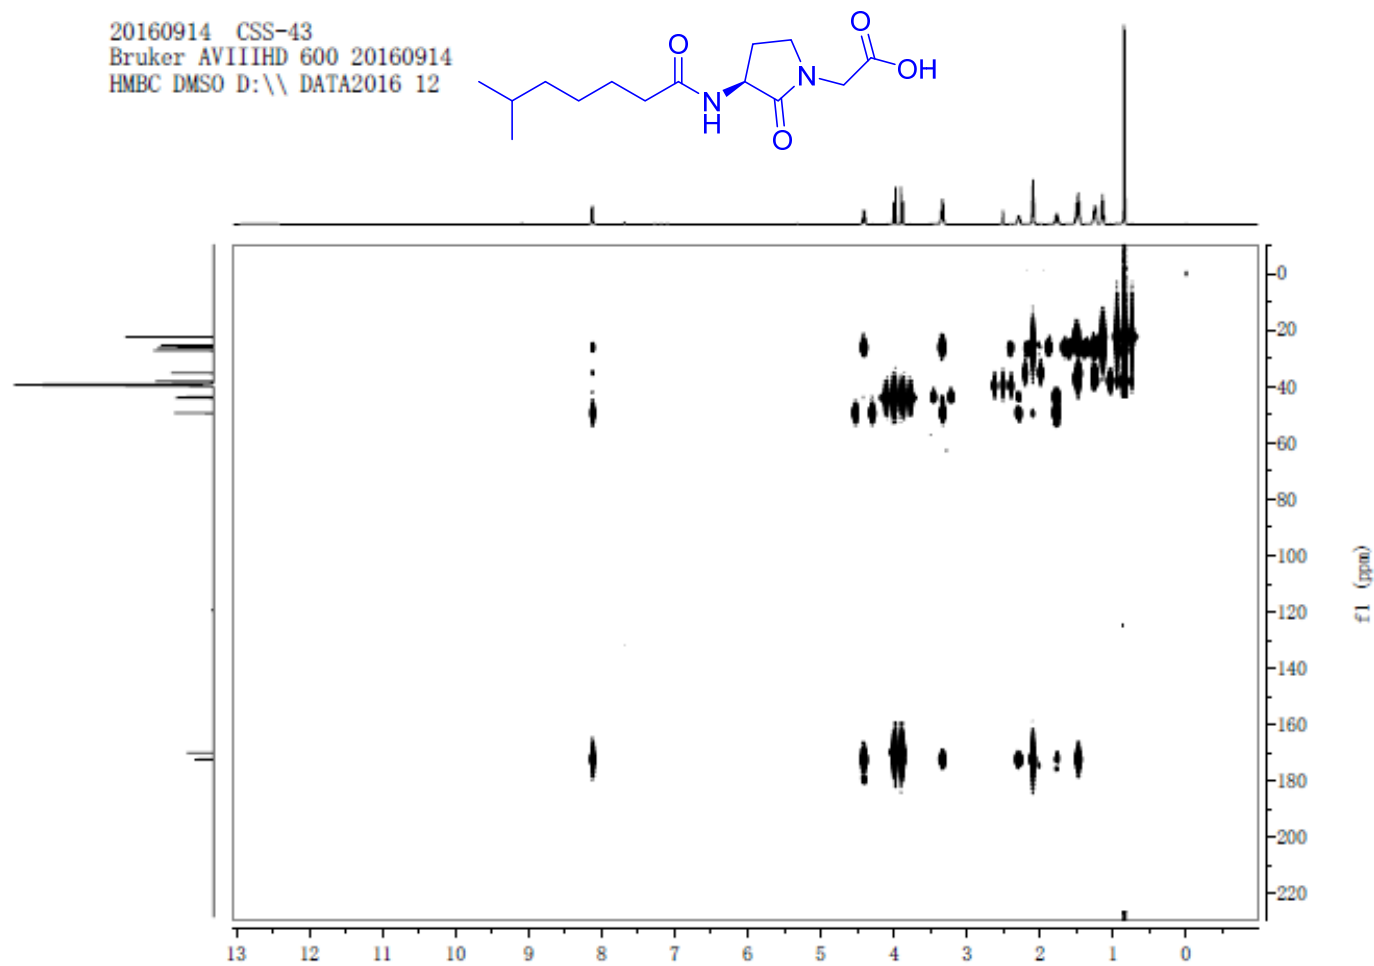

**Figure S26.** The HMBC Spectrum of Compound **3** in DMSO- $d_6$

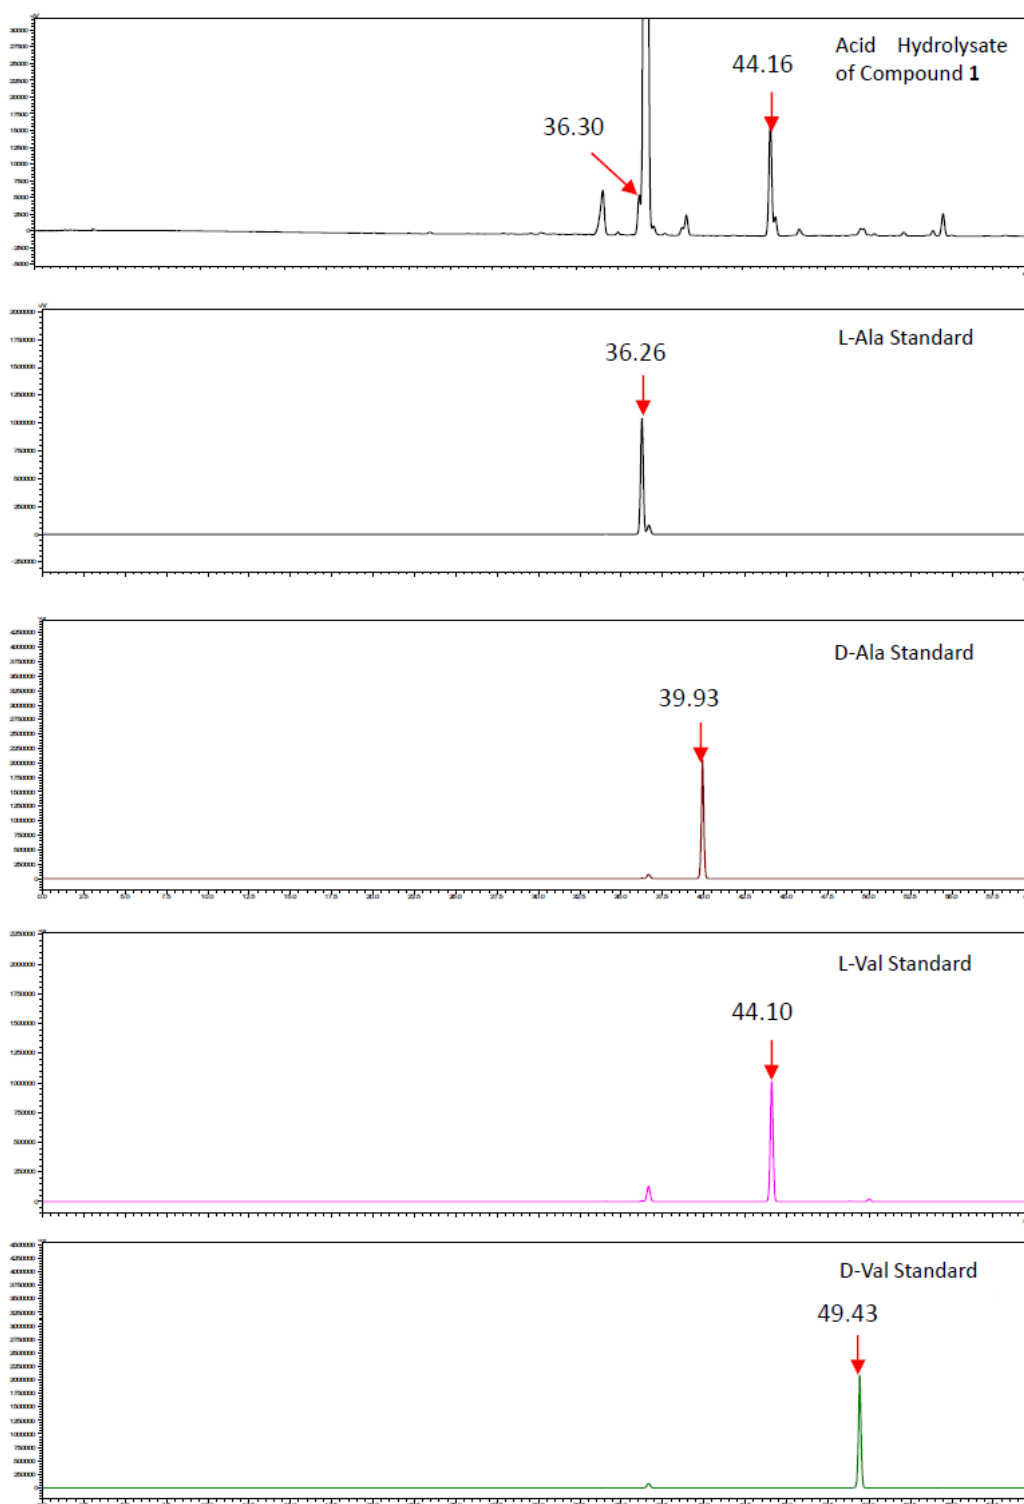

**Figure S27.** Marfey's Analysis of Acid Hydrolysate of Compound 1 ( $t_R$  min)

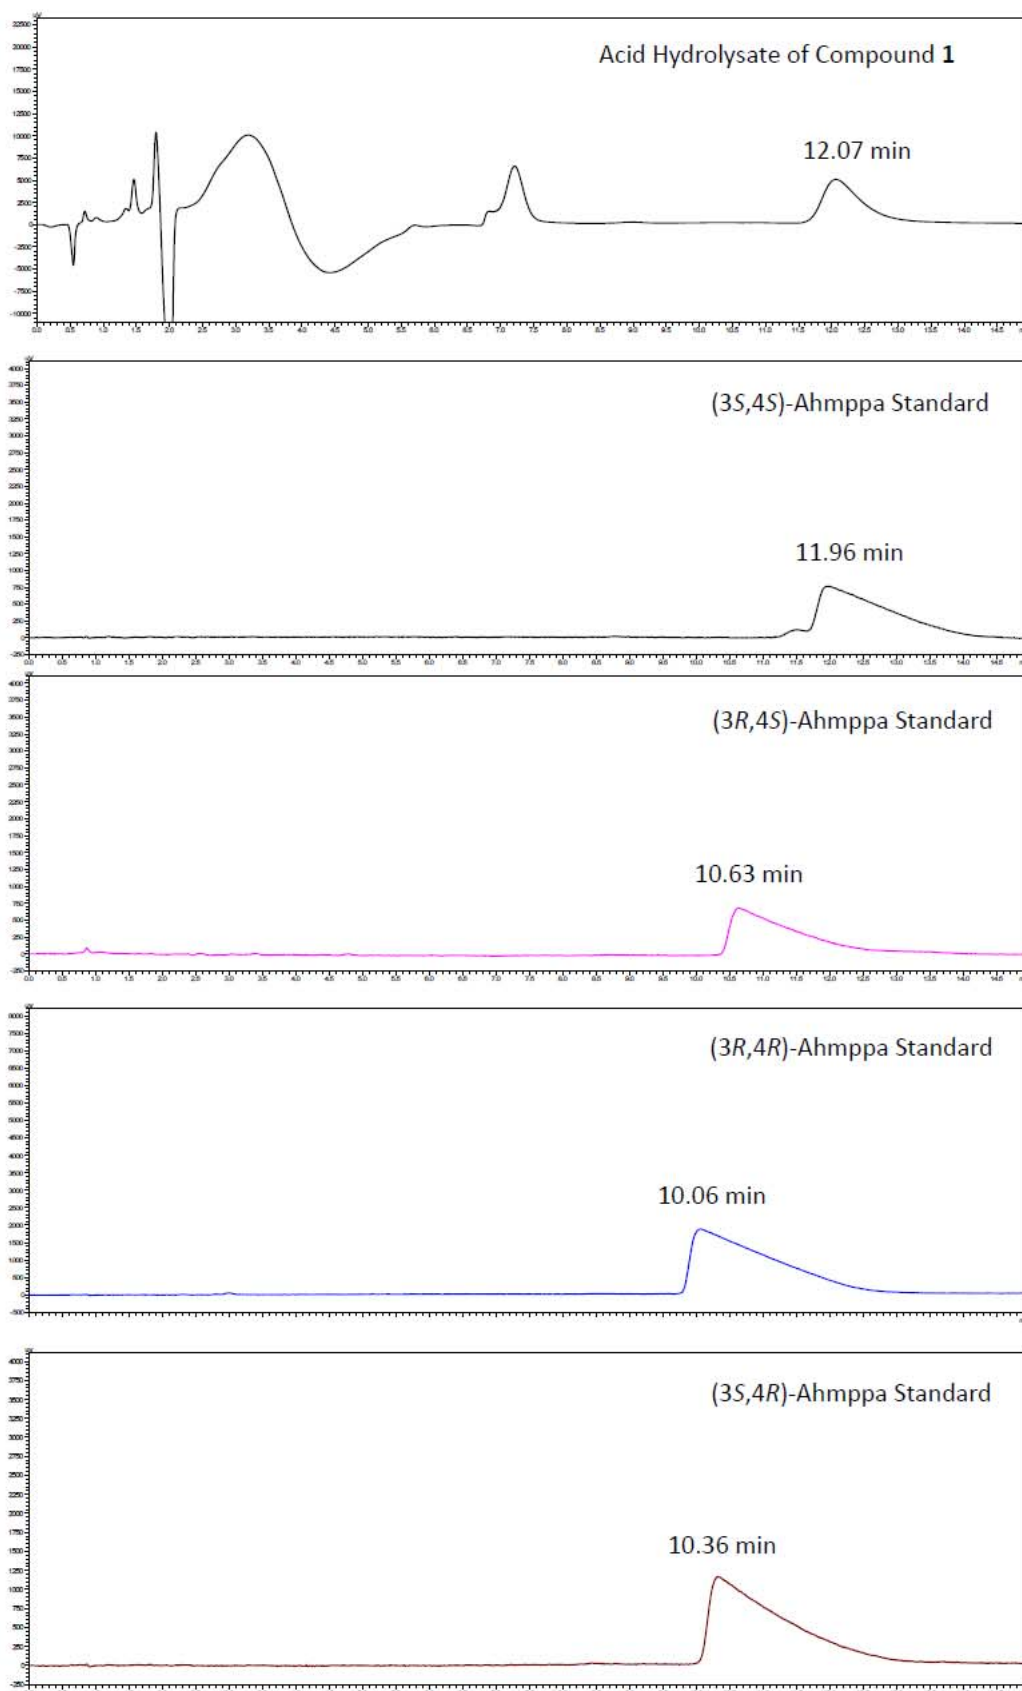

**Figure S28.** Chiral-phase HPLC Analysis of Acid Hydrolysate of Compound **1** ( $t_R$  min)
